# Supplementary material
Source: PubMed Central journal article supplement (PMC4227545)
Supplement: ol502527q_si_002.pdf [file ol502527q_si_002.pdf]

## Supporting Information II

### Lithium BINOL Phosphate Catalyzed Desymmetrization of *meso*-Epoxides with Aromatic Thiols

Gajendrasingh Ingle, Michael G. Mormino, Jon C. Antilla\*

*Department of Chemistry, University of South Florida, 4202 E. Fowler Ave., Tampa, Florida, 33620, USA.*

[\\*jantilla@usf.edu](mailto:*jantilla@usf.edu)

#### Contents:

<sup>1</sup>H, <sup>13</sup>C, and HPLC traces.....S2 – S39

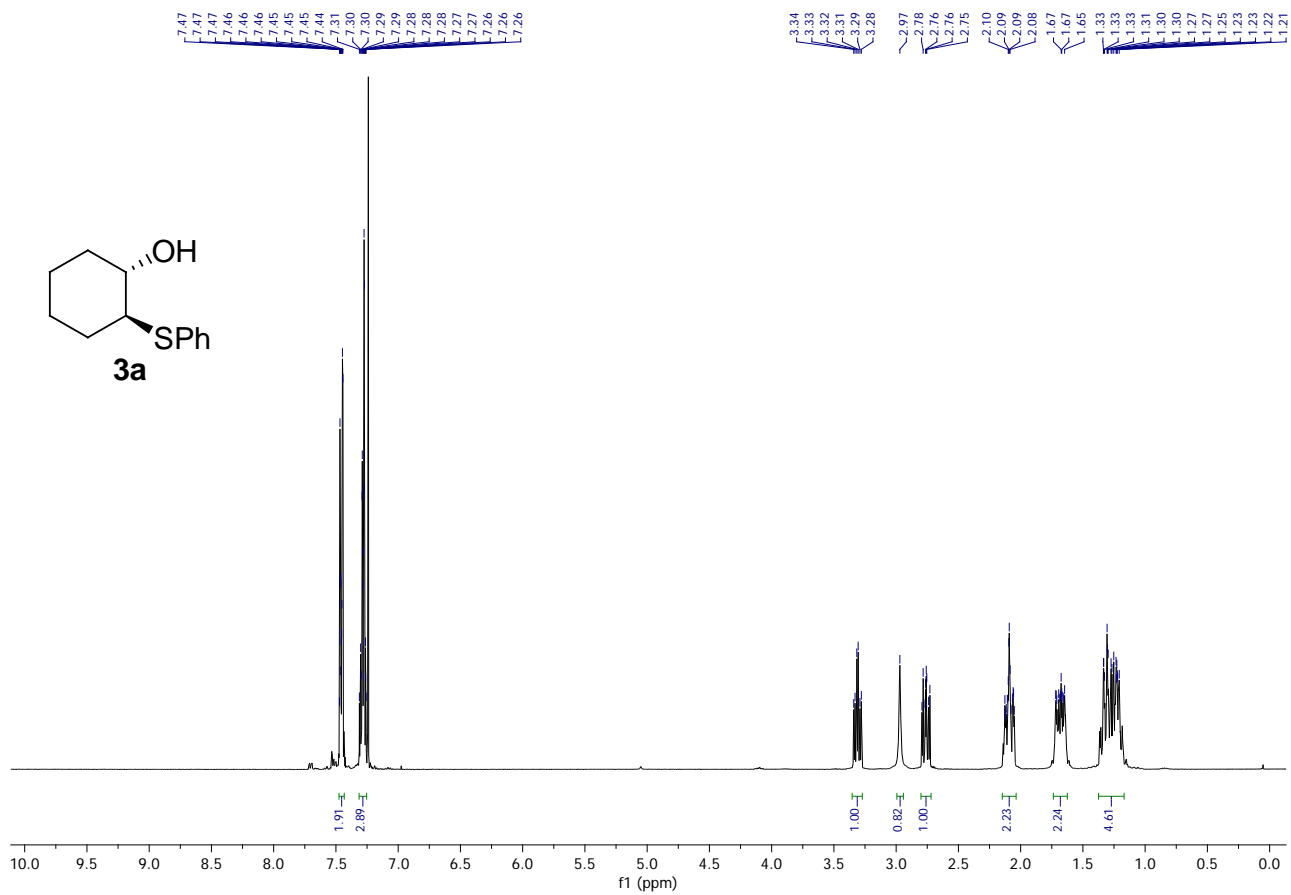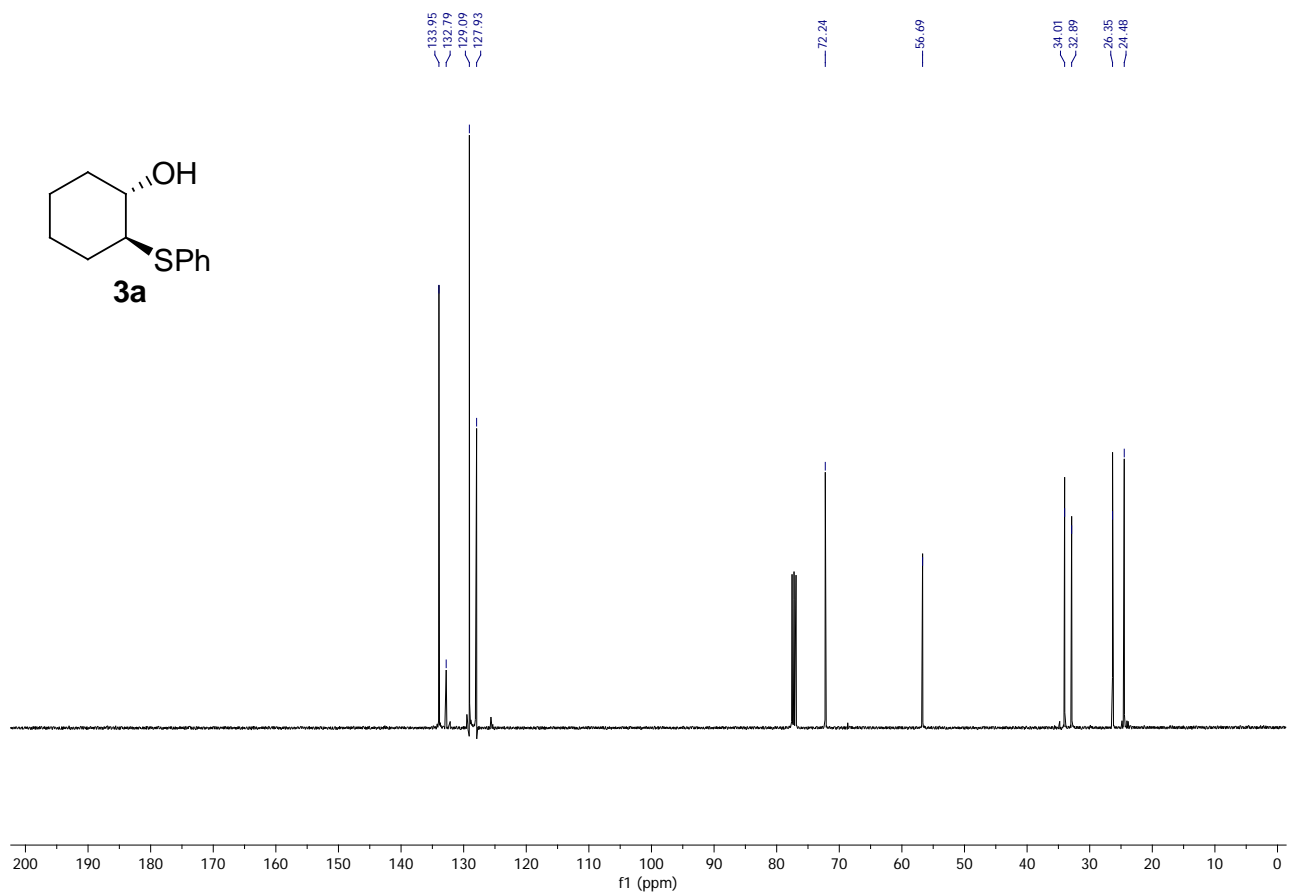

# Chromatogram : GI4-35C(OD\_5\_0.5)\_channel1

System : HPLC  
Method : Ingle  
User : User1

Acquired : 7/15/2012 9:58:08 PM  
Processed : 7/15/2012 10:30:15 PM  
Printed : 7/17/2012 2:06:45 PM

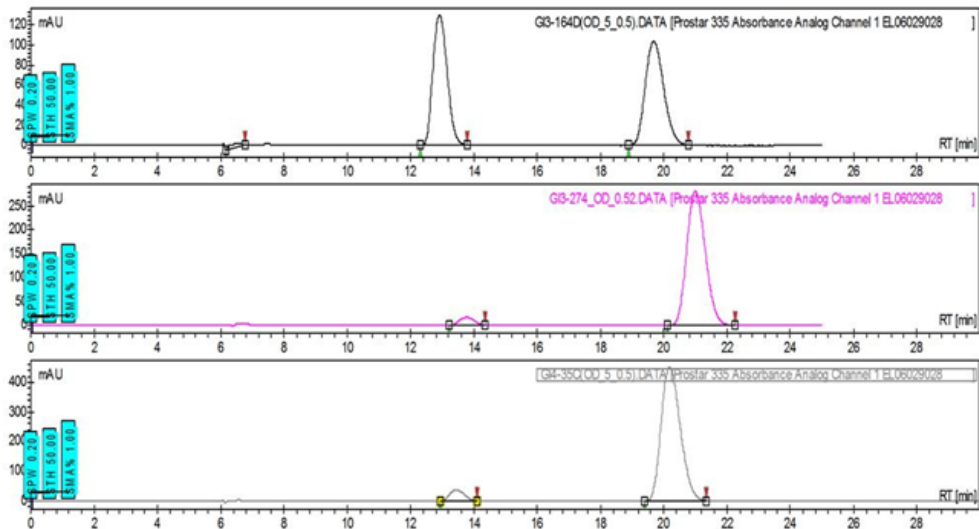

## Peak results :

GI3-164D(OD\_5\_0.5).DATA [Prostar 335 Absorbance Analog Channel 1 EL06029028 ]

| Index | Time [Min] | Height [mAU] | Width USP [Min] | Area [mAU.Min] | Area % [%] |
|-------|------------|--------------|-----------------|----------------|------------|
| 1     | 6.32       | 4.1          | 0.58            | 1.5            | 1.093      |
| 2     | 12.92      | 129.9        | 0.82            | 67.9           | 48.636     |
| 3     | 19.68      | 104.1        | 1.07            | 70.2           | 50.270     |
| Total |            | 238.1        |                 | 139.6          | 100.000    |

GI3-274 OD\_0.52.DATA [Prostar 335 Absorbance Analog Channel 1 EL06029028 ]

| Index | Time [Min] | Height [mAU] | Width USP [Min] | Area [mAU.Min] | Area % [%] |
|-------|------------|--------------|-----------------|----------------|------------|
| 1     | 13.76      | 16.5         | 0.86            | 9.0            | 4.480      |
| 2     | 21.00      | 280.2        | 1.09            | 191.1          | 95.520     |
| Total |            | 296.7        |                 | 200.0          | 100.000    |

GI4-35C(OD\_5\_0.5).DATA [Prostar 335 Absorbance Analog Channel 1 EL06029028 ]

| Index | Time [Min] | Height [mAU] | Width USP [Min] | Area [mAU.Min] | Area % [%] |
|-------|------------|--------------|-----------------|----------------|------------|
| 1     | 13.44      | 35.9         | 0.86            | 19.5           | 5.799      |
| 2     | 20.19      | 451.5        | 1.12            | 317.4          | 94.201     |
| Total |            | 487.4        |                 | 337.0          | 100.000    |

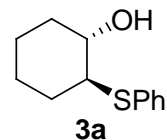

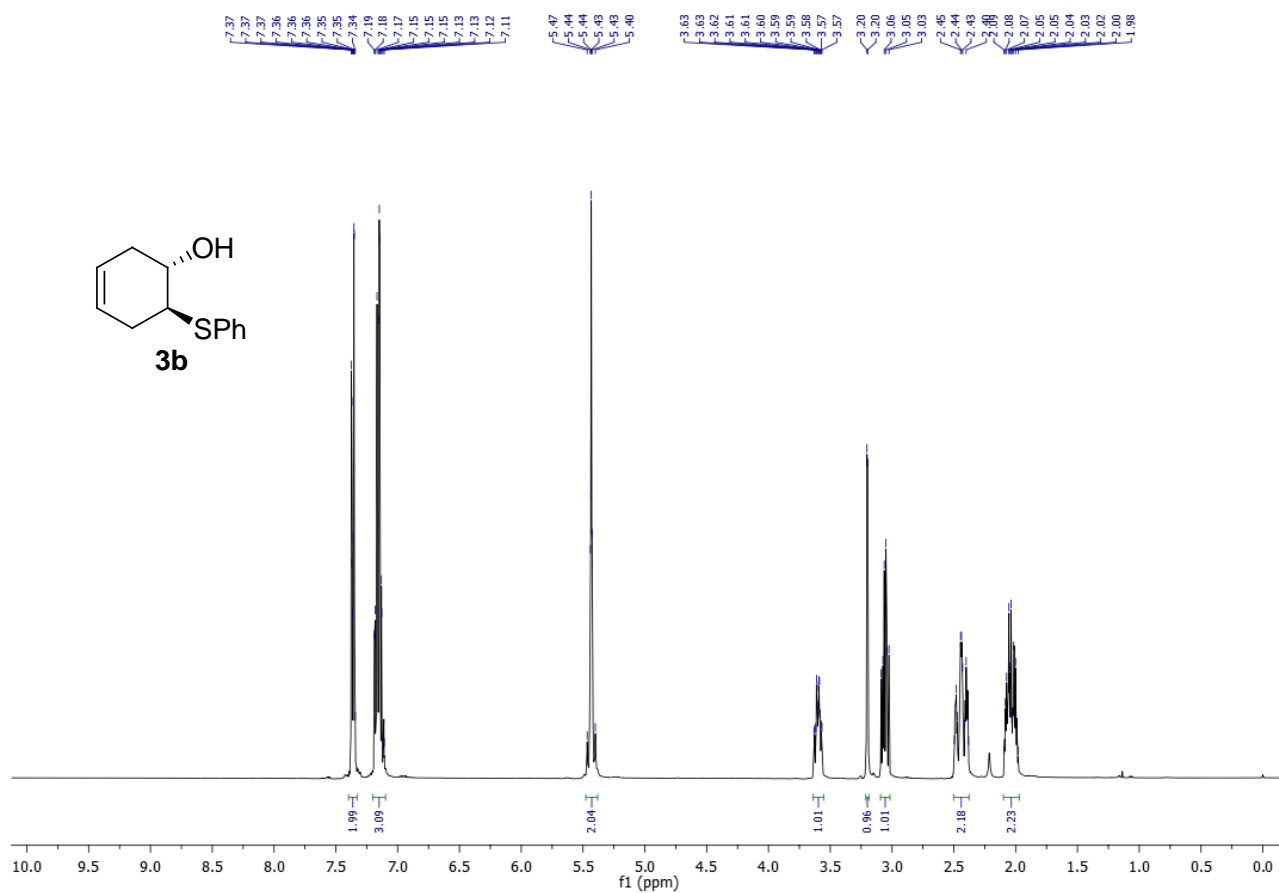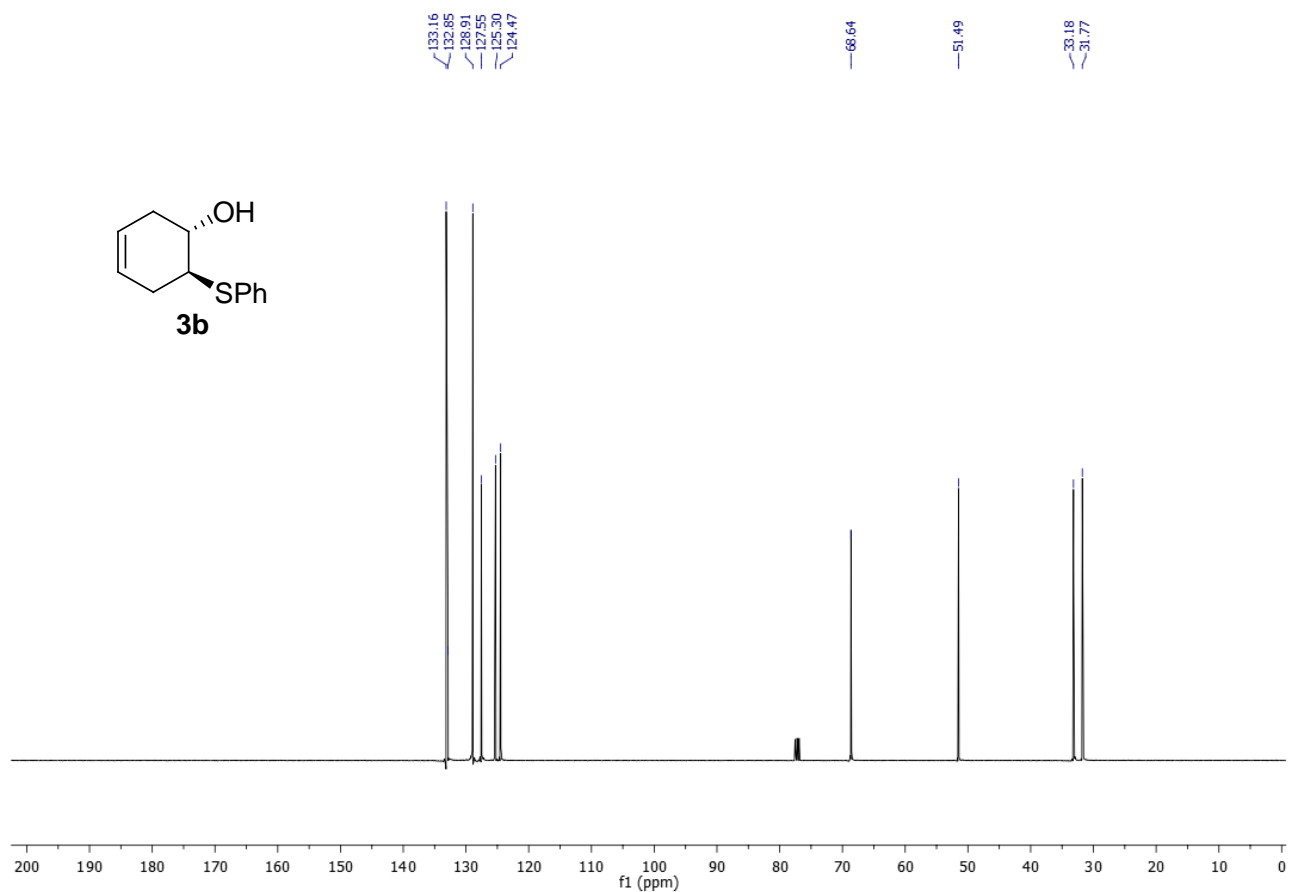

# Chromatogram : GI4-51(OD\_H\_10)\_channel1

System : HPLC  
Method : Ingle  
User : User1

Acquired : 10/5/2011 12:19:47 PM  
Processed : 10/5/2011 2:16:05 PM  
Printed : 7/12/2012 10:32:52 PM

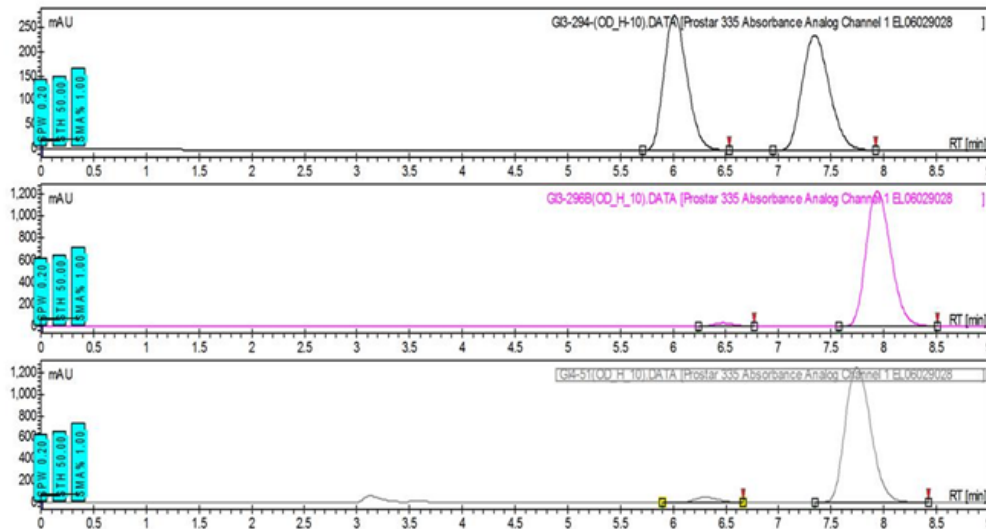

## Peak results :

GI3-294-(OD\_H\_10).DATA [Prostar 335 Absorbance Analog Channel 1 EL06029028 ]

| Index | Time [Min] | Height [mAU] | Width USP [Min] | Area [mAU.Min] | Area % [%] |
|-------|------------|--------------|-----------------|----------------|------------|
| 1     | 6.01       | 280.5        | 0.41            | 71.1           | 49.841     |
| 2     | 7.35       | 238.7        | 0.48            | 71.5           | 50.159     |
| Total |            | 519.2        |                 | 142.6          | 100.000    |

GI3-296B(OD\_H\_10).DATA [Prostar 335 Absorbance Analog Channel 1 EL06029028 ]

| Index | Time [Min] | Height [mAU] | Width USP [Min] | Area [mAU.Min] | Area % [%] |
|-------|------------|--------------|-----------------|----------------|------------|
| 1     | 6.47       | 31.2         | 0.35            | 6.8            | 2.000      |
| 2     | 7.93       | 1226.6       | 0.43            | 333.4          | 98.000     |
| Total |            | 1257.9       |                 | 340.2          | 100.000    |

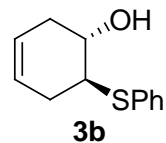

GI4-51(OD\_H\_10).DATA [Prostar 335 Absorbance Analog Channel 1 EL06029028 ]

| Index | Time [Min] | Height [mAU] | Width USP [Min] | Area [mAU.Min] | Area % [%] |
|-------|------------|--------------|-----------------|----------------|------------|
| 1     | 6.31       | 47.5         | 0.38            | 11.2           | 3.073      |
| 2     | 7.75       | 1252.9       | 0.45            | 354.5          | 96.927     |
| Total |            | 1300.3       |                 | 365.7          | 100.000    |

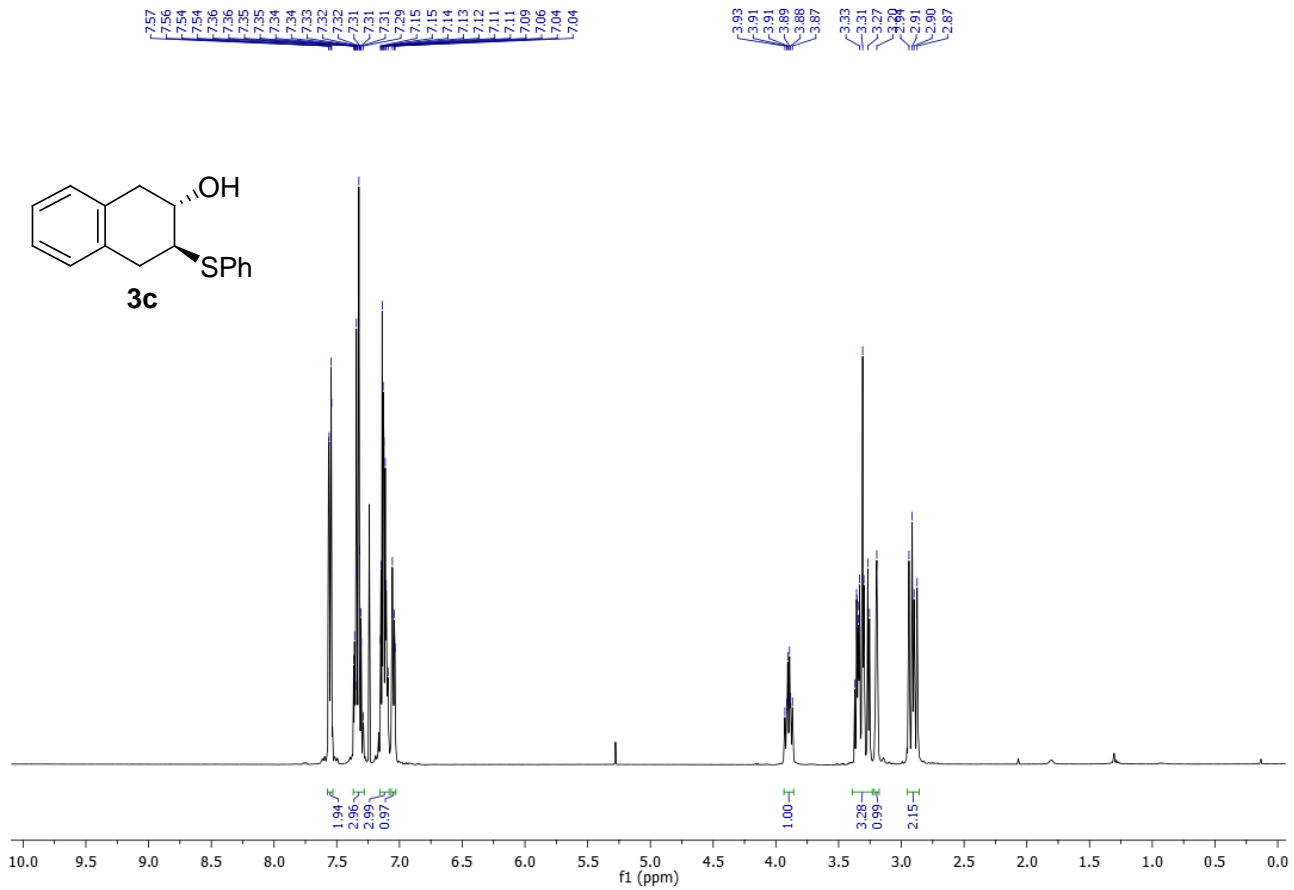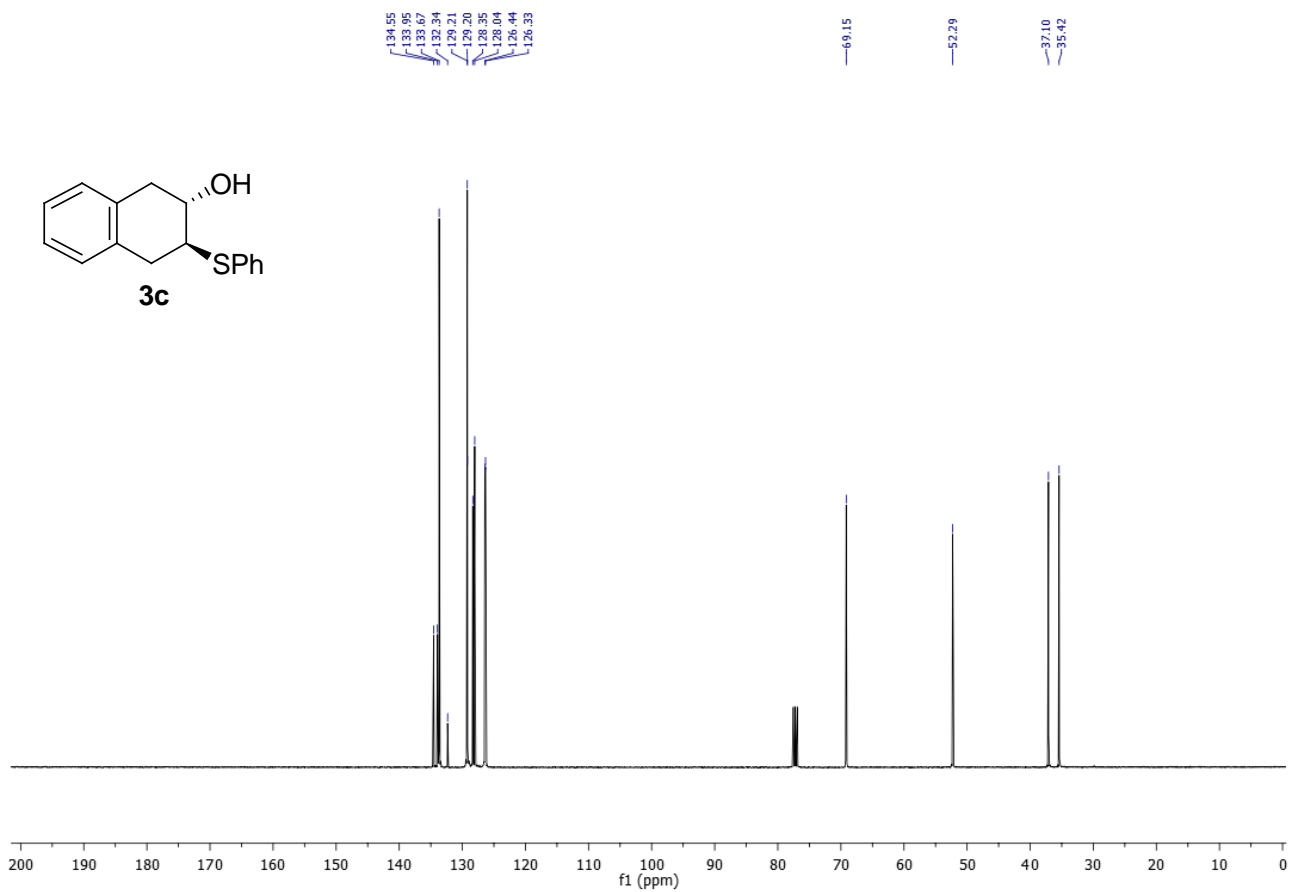

# Chromatogram : GI4-015(OD\_10)\_channel1

System : HPLC  
Method : Ingle  
User : User1

Acquired : 8/21/2011 9:14:46 PM  
Processed : 7/12/2012 10:42:19 PM  
Printed : 7/19/2012 9:37:25 PM

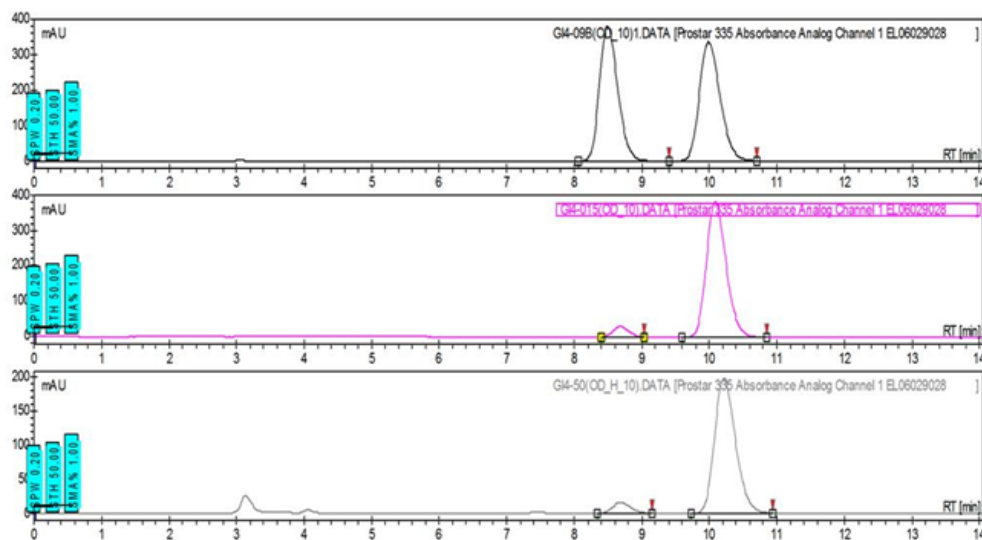

## Peak results :

GI4-09B(OD\_10)1.DATA [Prostar 335 Absorbance Analog Channel 1 EL06029028 ]

| Index | Time [Min] | Height [mAU] | Width USP [Min] | Area [mAU.Min] | Area % [%] |
|-------|------------|--------------|-----------------|----------------|------------|
| 1     | 8.49       | 381.6        | 0.50            | 120.5          | 50.044     |
| 2     | 9.99       | 337.7        | 0.57            | 120.3          | 49.956     |
| Total |            | 719.3        |                 | 240.8          | 100.000    |

GI4-015(OD\_10).DATA [Prostar 335 Absorbance Analog Channel 1 EL06029028 ]

| Index | Time [Min] | Height [mAU] | Width USP [Min] | Area [mAU.Min] | Area % [%] |
|-------|------------|--------------|-----------------|----------------|------------|
| 1     | 8.68       | 29.2         | 0.45            | 8.0            | 5.778      |
| 2     | 10.09      | 385.6        | 0.54            | 131.0          | 94.222     |
| Total |            | 414.8        |                 | 139.0          | 100.000    |

GI4-50(OD\_H\_10).DATA [Prostar 335 Absorbance Analog Channel 1 EL06029028 ]

| Index | Time [Min] | Height [mAU] | Width USP [Min] | Area [mAU.Min] | Area % [%] |
|-------|------------|--------------|-----------------|----------------|------------|
| 1     | 8.68       | 16.0         | 0.48            | 4.8            | 6.350      |
| 2     | 10.21      | 197.6        | 0.57            | 71.4           | 93.650     |
| Total |            | 213.6        |                 | 76.3           | 100.000    |

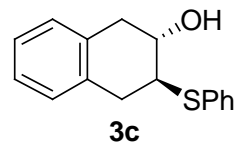

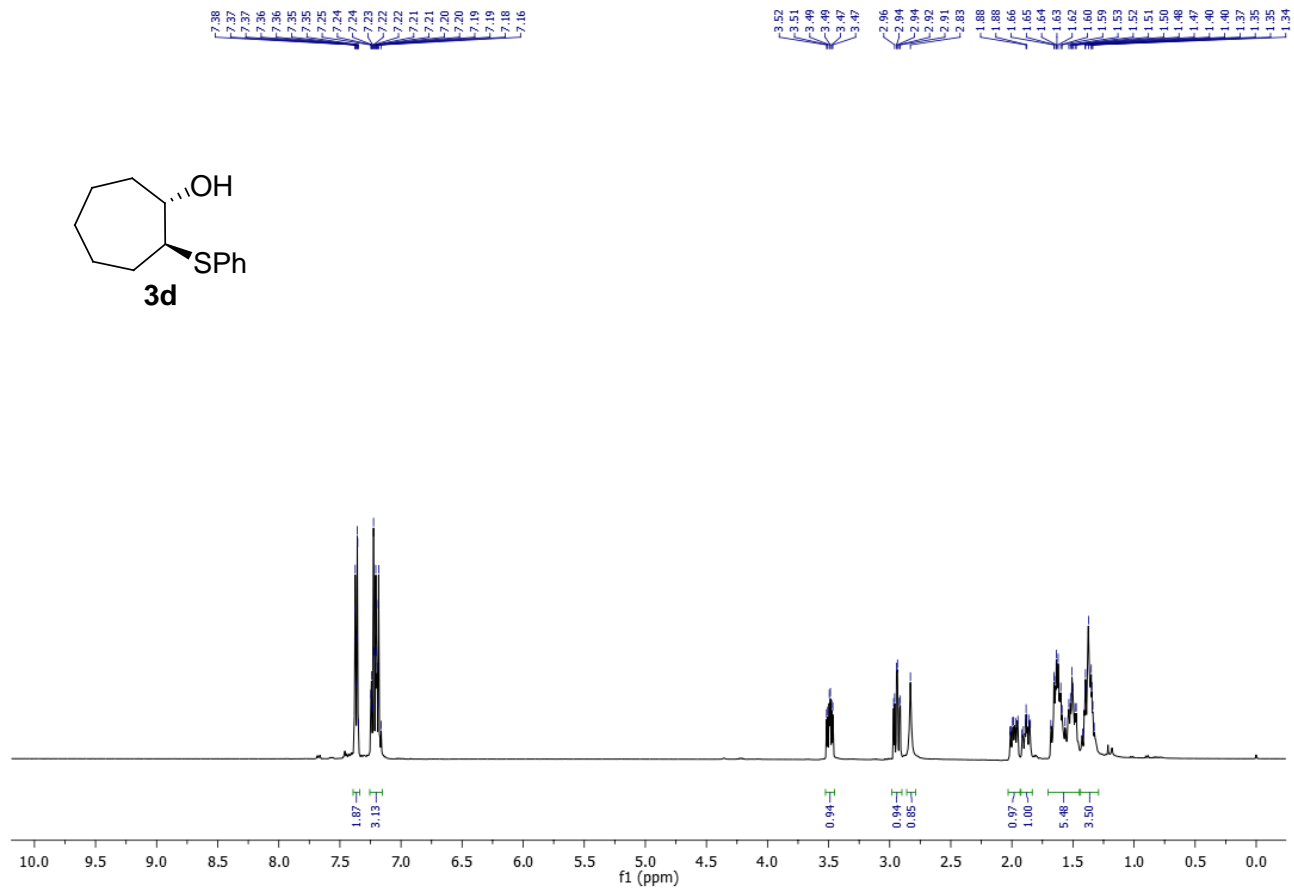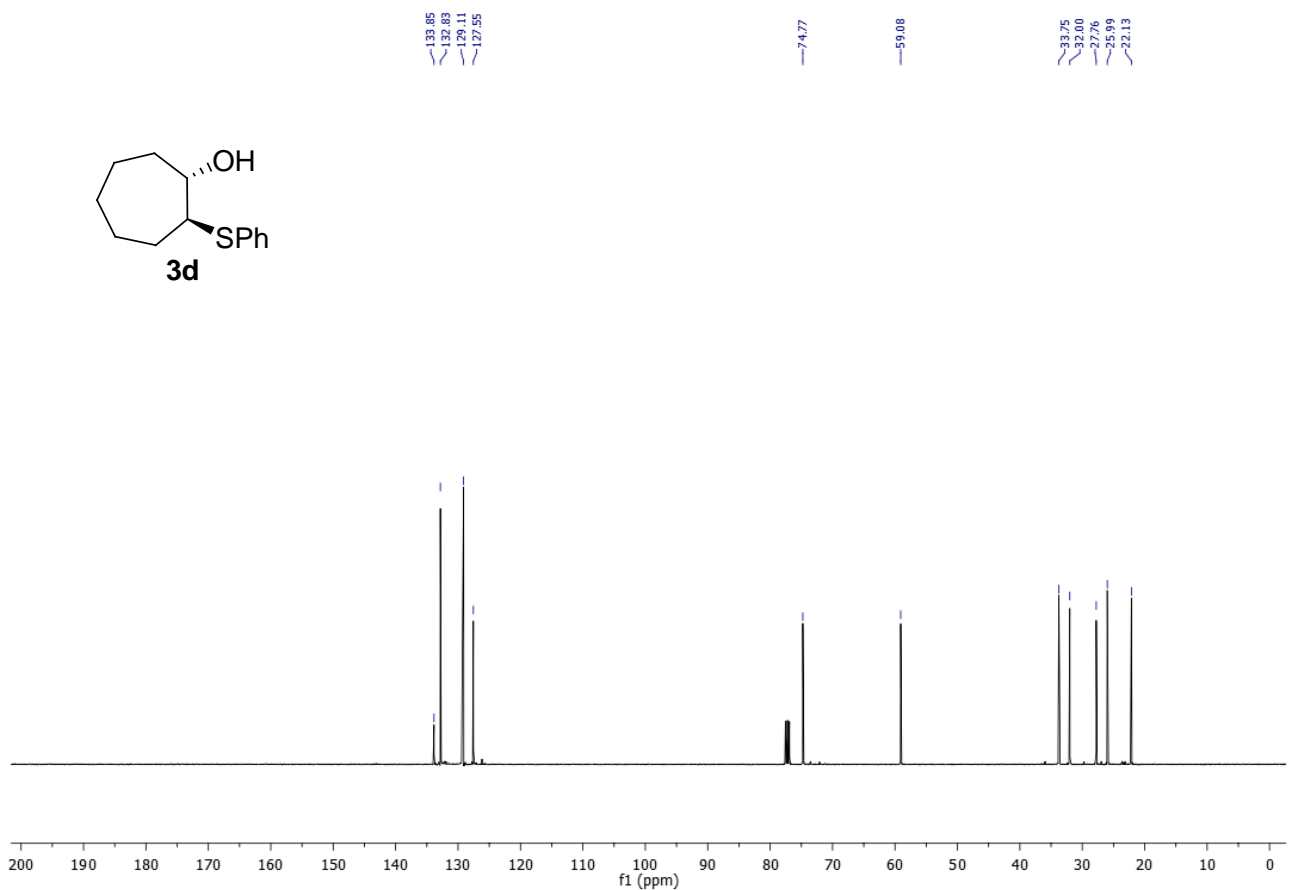



# Chromatogram : GI4-39(OD\_H\_10)\_channel1

System : HPLC  
Method : Ingle  
User : User1

Acquired : 9/26/2011 1:06:19 PM  
Processed : 9/26/2011 2:12:43 PM  
Printed : 7/15/2012 10:09:39 PM

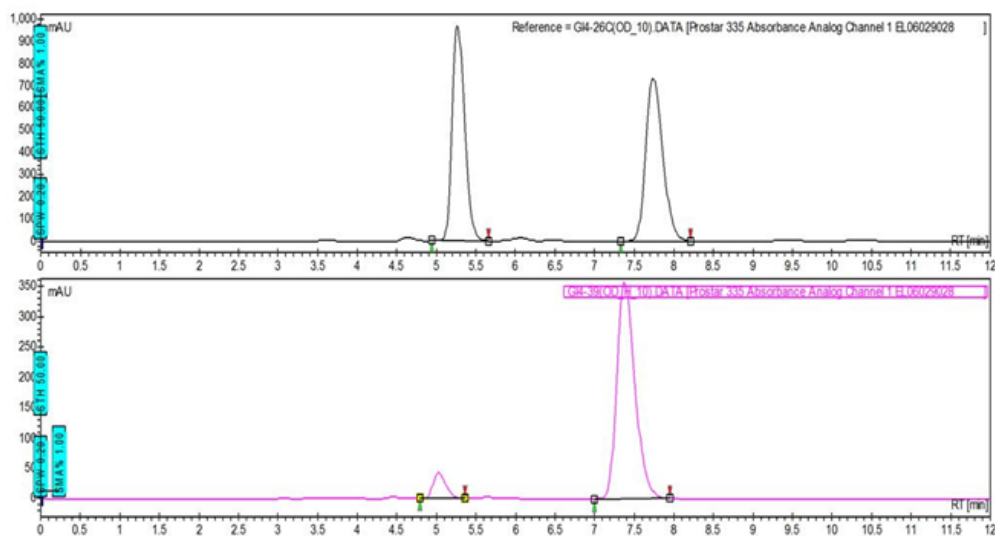

## Peak results :

GI4-26C(OD\_10).DATA [Prostar 335 Absorbance Analog Channel 1 EL06029028 ]

| Index | Time [Min] | Height [mAU] | Width USP [Min] | Area [mAU.Min] | Area % [%] |
|-------|------------|--------------|-----------------|----------------|------------|
| 1     | 5.27       | 969.1        | 0.30            | 179.5          | 49.353     |
| 2     | 7.75       | 728.5        | 0.40            | 184.2          | 50.647     |
| Total |            | 1697.6       |                 | 363.7          | 100.000    |

GI4-39(OD\_H\_10).DATA [Prostar 335 Absorbance Analog Channel 1 EL06029028 ]

| Index | Time [Min] | Height [mAU] | Width USP [Min] | Area [mAU.Min] | Area % [%] |
|-------|------------|--------------|-----------------|----------------|------------|
| 1     | 5.03       | 42.9         | 0.30            | 8.1            | 7.870      |
| 2     | 7.37       | 355.8        | 0.42            | 94.7           | 92.130     |
| Total |            | 398.6        |                 | 102.8          | 100.000    |

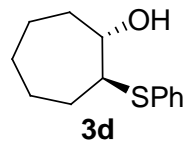

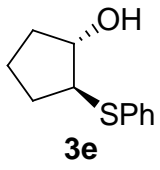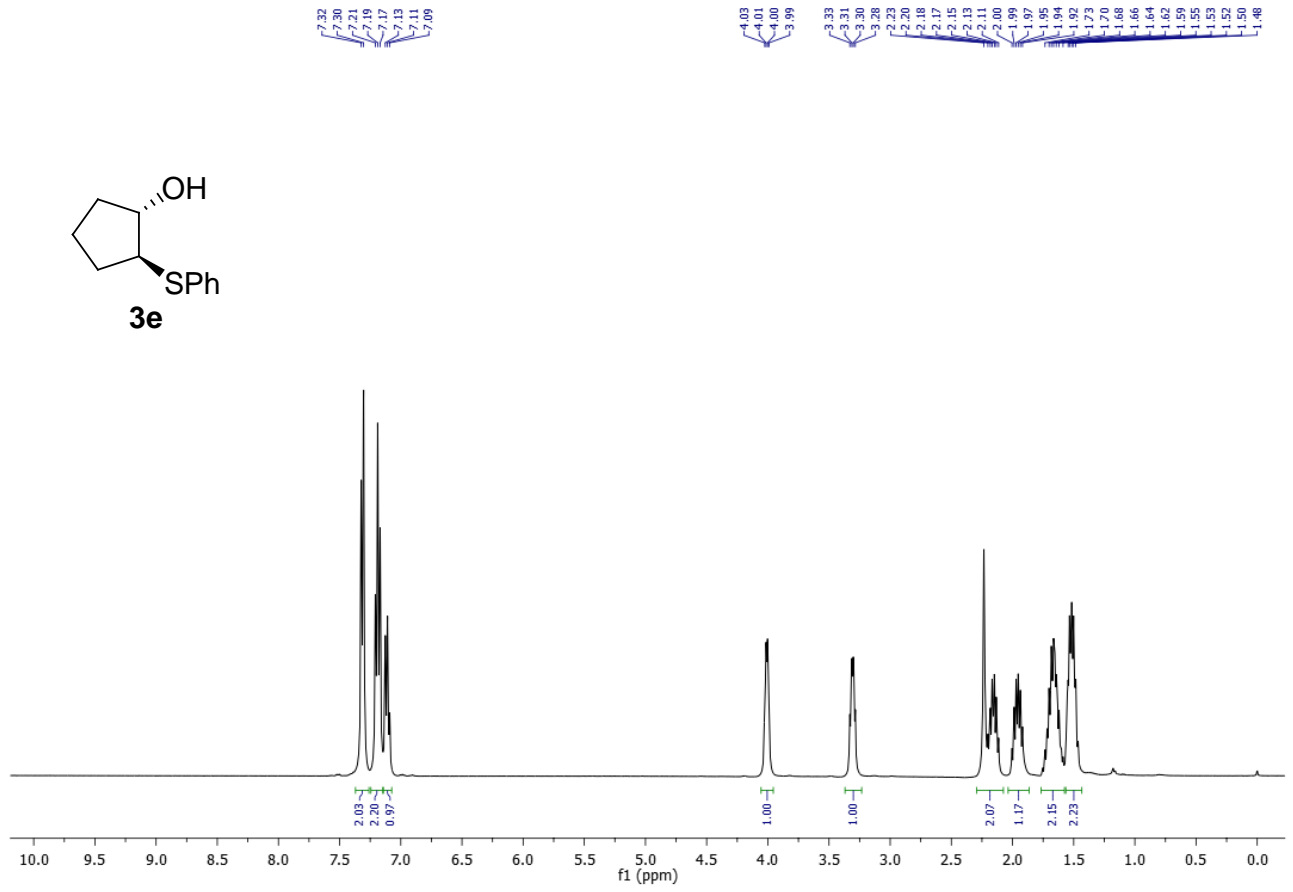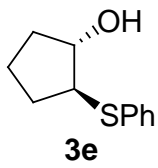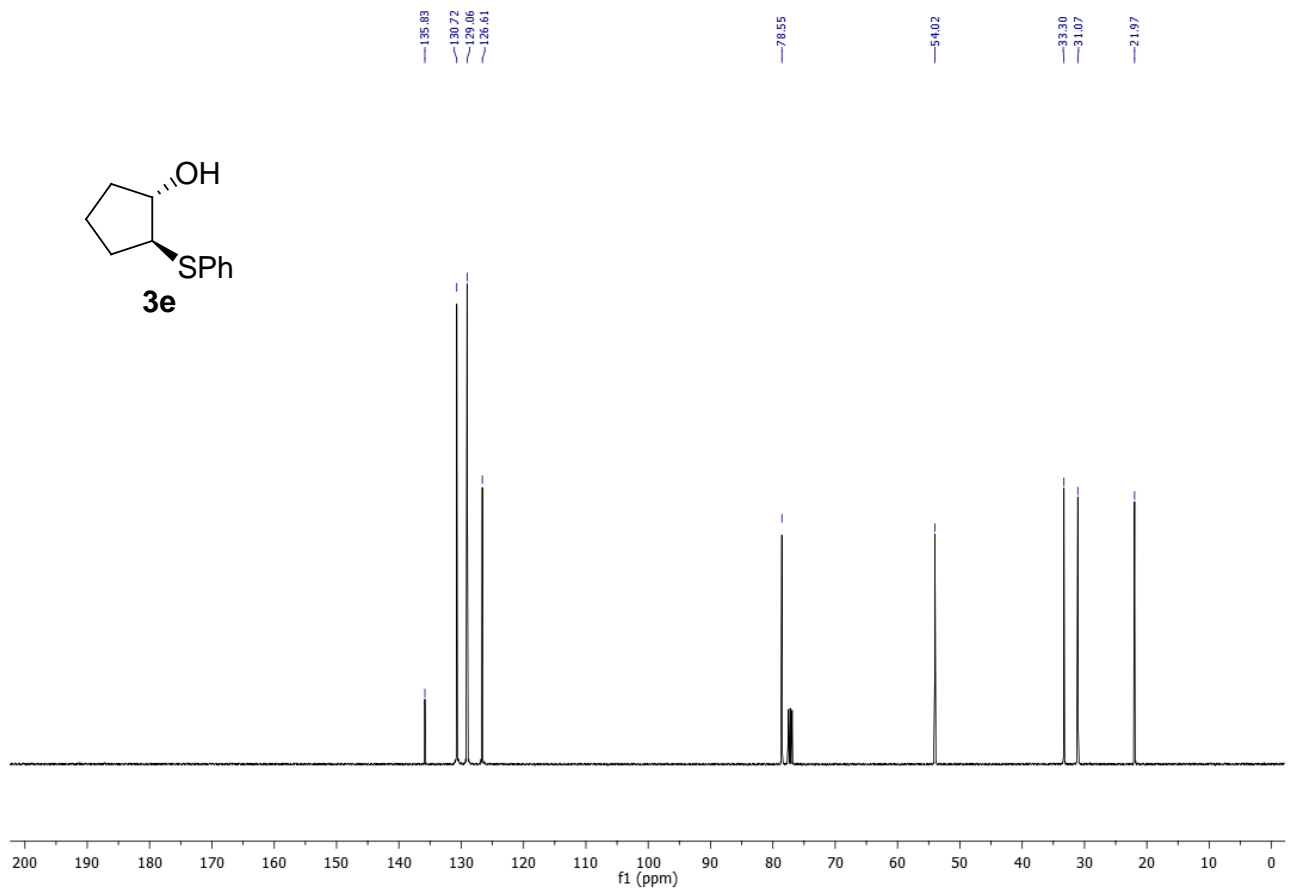

## Chromatogram : GI3-017(OD\_5)\_channel1

System : HPLC  
Method : Ingle  
User : User1

Acquired : 8/21/2011 9:39:45 PM  
Processed : 8/21/2011 9:57:04 PM  
Printed : 7/19/2012 9:39:17 PM

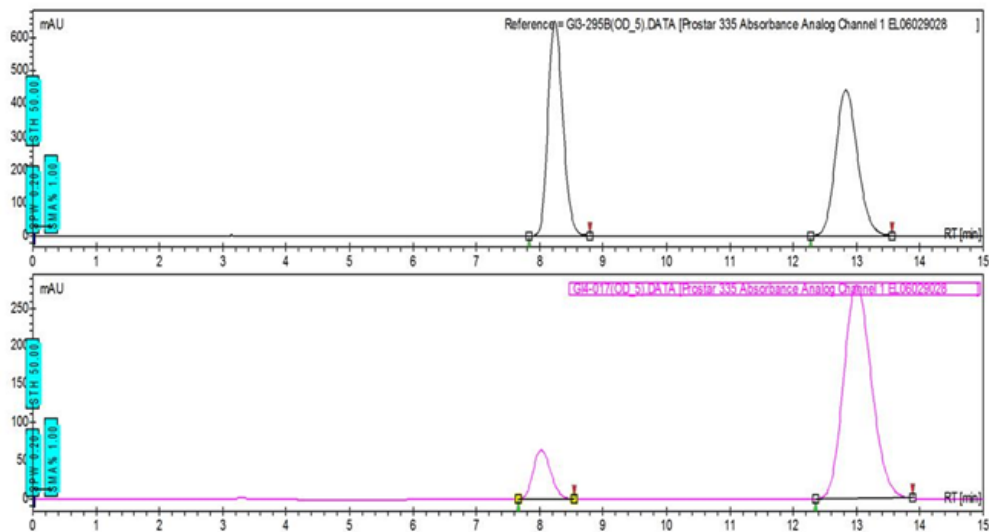

### Peak results :

GI3-295B(OD\_5)\_DATA [Prostar 335 Absorbance Analog Channel 1 EL06029028 ]

| Index | Time [Min] | Height [mAU] | Width USP [Min] | Area [mAU.Min] | Area % [%] |
|-------|------------|--------------|-----------------|----------------|------------|
| 1     | 8.24       | 650.3        | 0.43            | 177.1          | 49.852     |
| 2     | 12.83      | 442.1        | 0.64            | 178.1          | 50.148     |
| Total |            | 1092.4       |                 | 355.2          | 100.000    |

GI4-017(OD\_5)\_DATA [Prostar 335 Absorbance Analog Channel 1 EL06029028 ]

| Index | Time [Min] | Height [mAU] | Width USP [Min] | Area [mAU.Min] | Area % [%] |
|-------|------------|--------------|-----------------|----------------|------------|
| 1     | 8.03       | 63.8         | 0.51            | 20.1           | 12.331     |
| 2     | 13.00      | 280.2        | 0.81            | 142.9          | 87.669     |
| Total |            | 344.0        |                 | 163.0          | 100.000    |

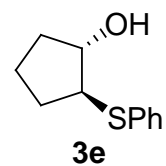

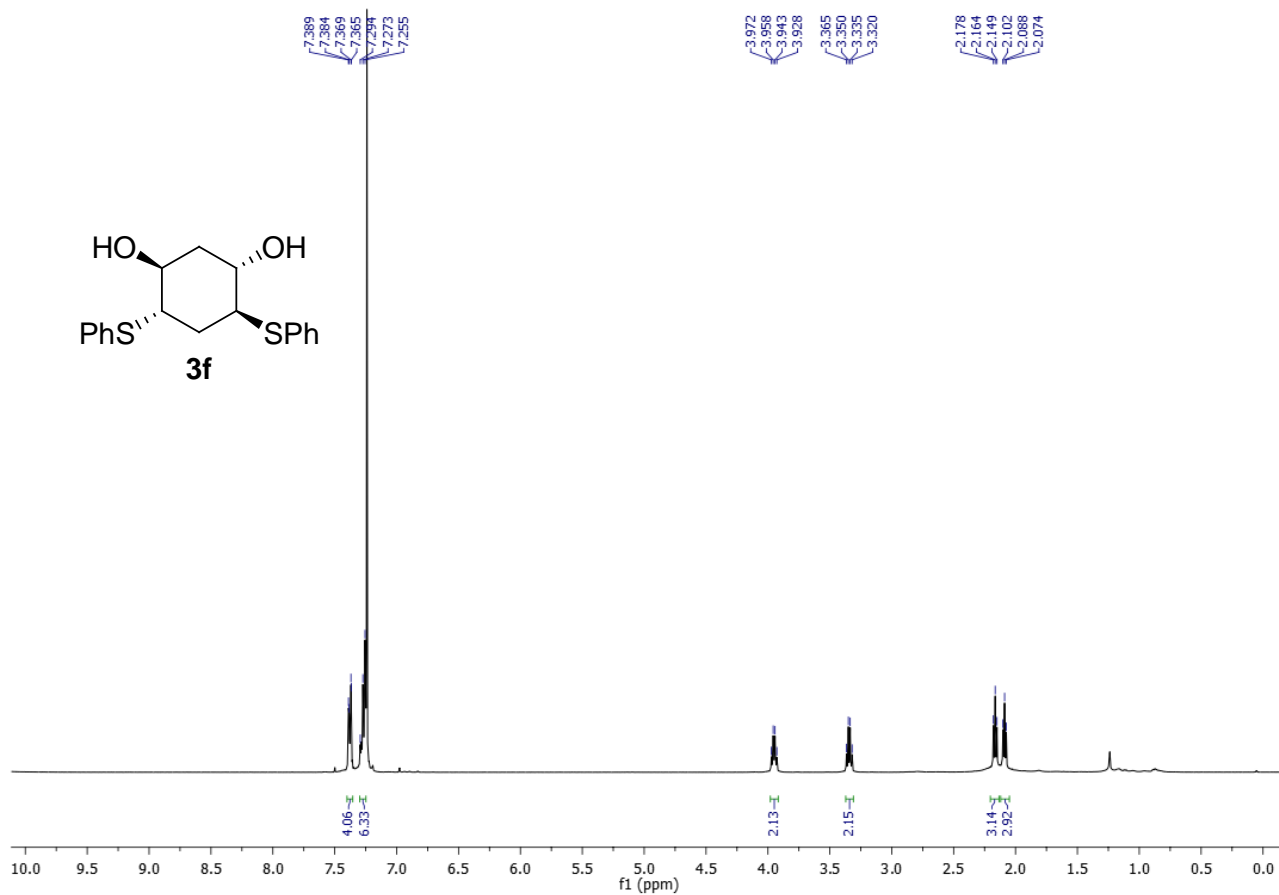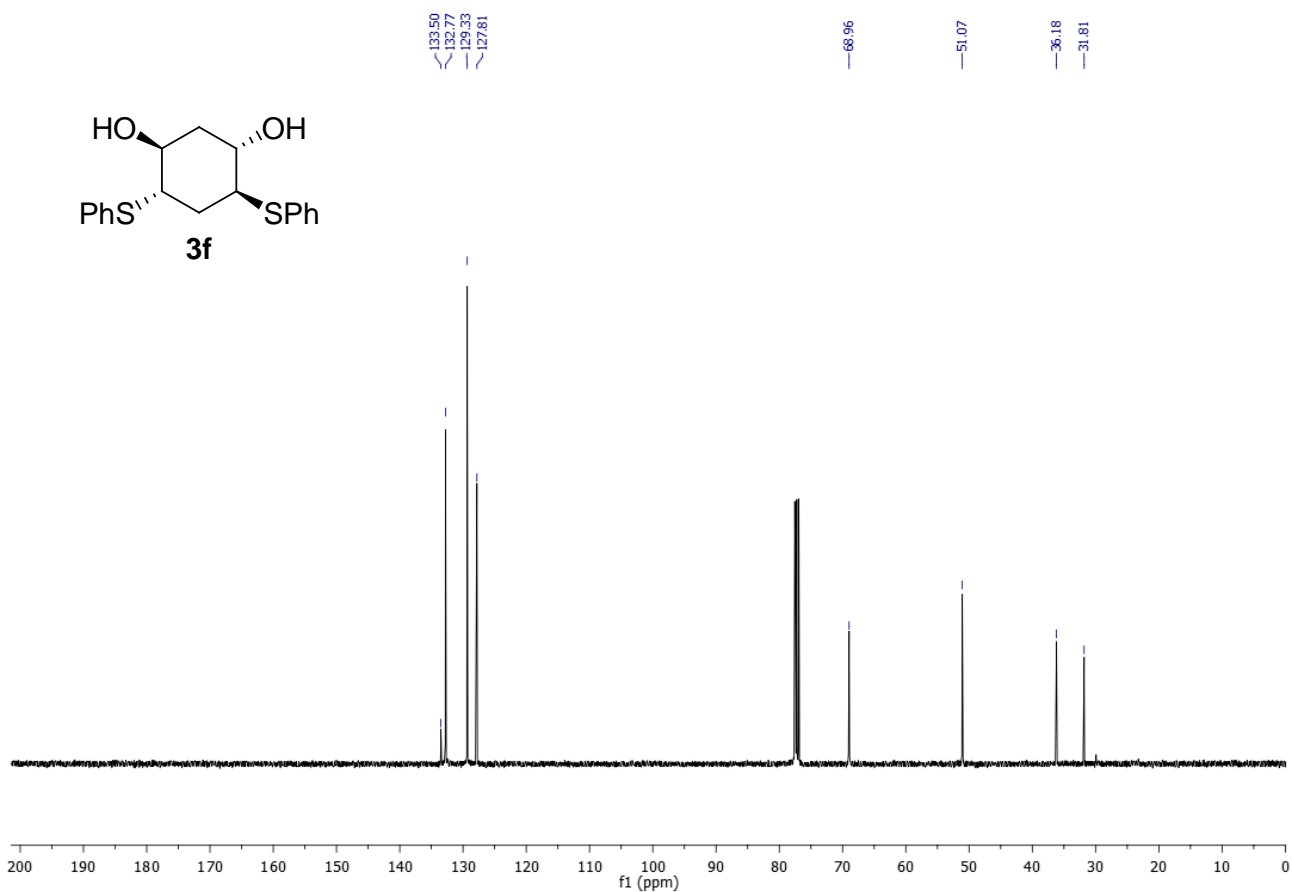

## Chromatogram : GI4-180(OD\_15)\_channel1

System : HPLC  
Method : Ingle  
User : User1

Acquired : 4/20/2012 2:39:25 PM  
Processed : 7/12/2012 10:57:14 PM  
Printed : 7/12/2012 10:58:43 PM

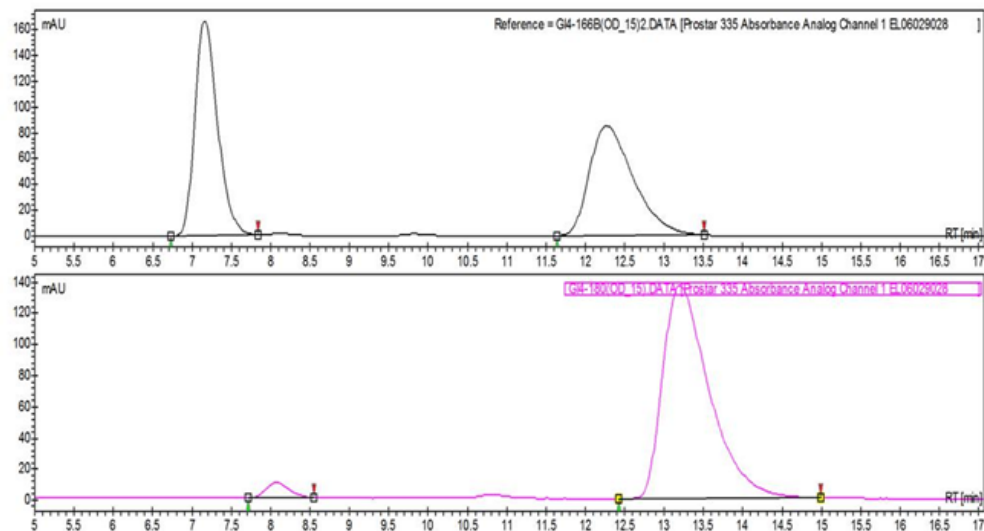

### Peak results :

GI4-166B(OD\_15)2.D\\ATA [Prostar 335 Absorbance Analog Channel 1 EL06029028 ]

| Index | Time [Min] | Height [mAU] | Width USP [Min] | Area [mAU.Min] | Area % [%] |
|-------|------------|--------------|-----------------|----------------|------------|
| 2     | 7.16       | 166.7        | 0.53            | 55.8           | 50.231     |
| 1     | 12.27      | 85.3         | 1.02            | 55.3           | 49.769     |
| Total |            | 252.0        |                 | 111.1          | 100.000    |

GI4-180(OD\_15)2.D\\ATA [Prostar 335 Absorbance Analog Channel 1 EL06029028 ]

| Index | Time [Min] | Height [mAU] | Width USP [Min] | Area [mAU.Min] | Area % [%] |
|-------|------------|--------------|-----------------|----------------|------------|
| 2     | 8.07       | 9.7          | 0.54            | 3.3            | 3.378      |
| 1     | 13.20      | 136.7        | 1.06            | 93.6           | 96.622     |
| Total |            | 146.4        |                 | 96.9           | 100.000    |

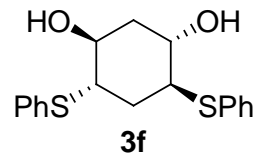

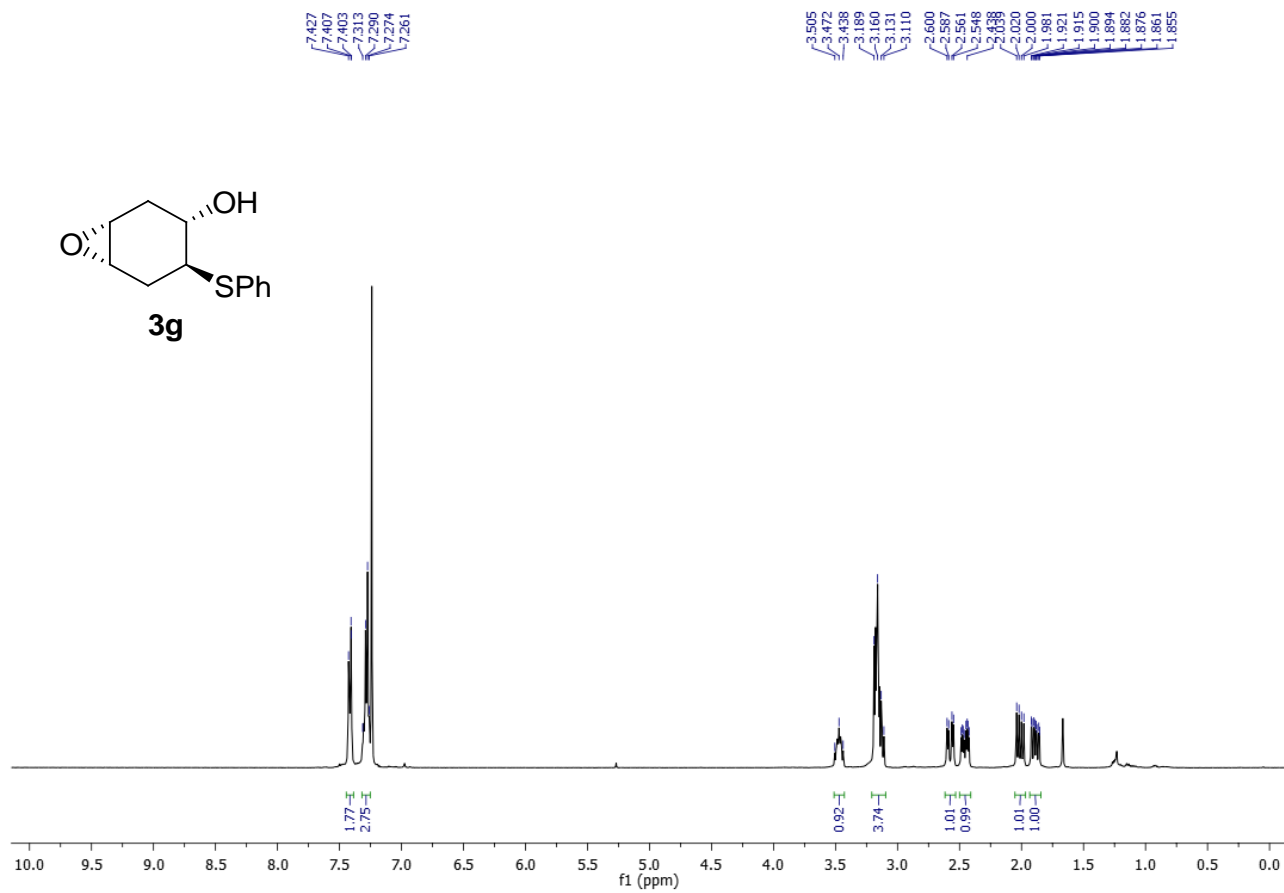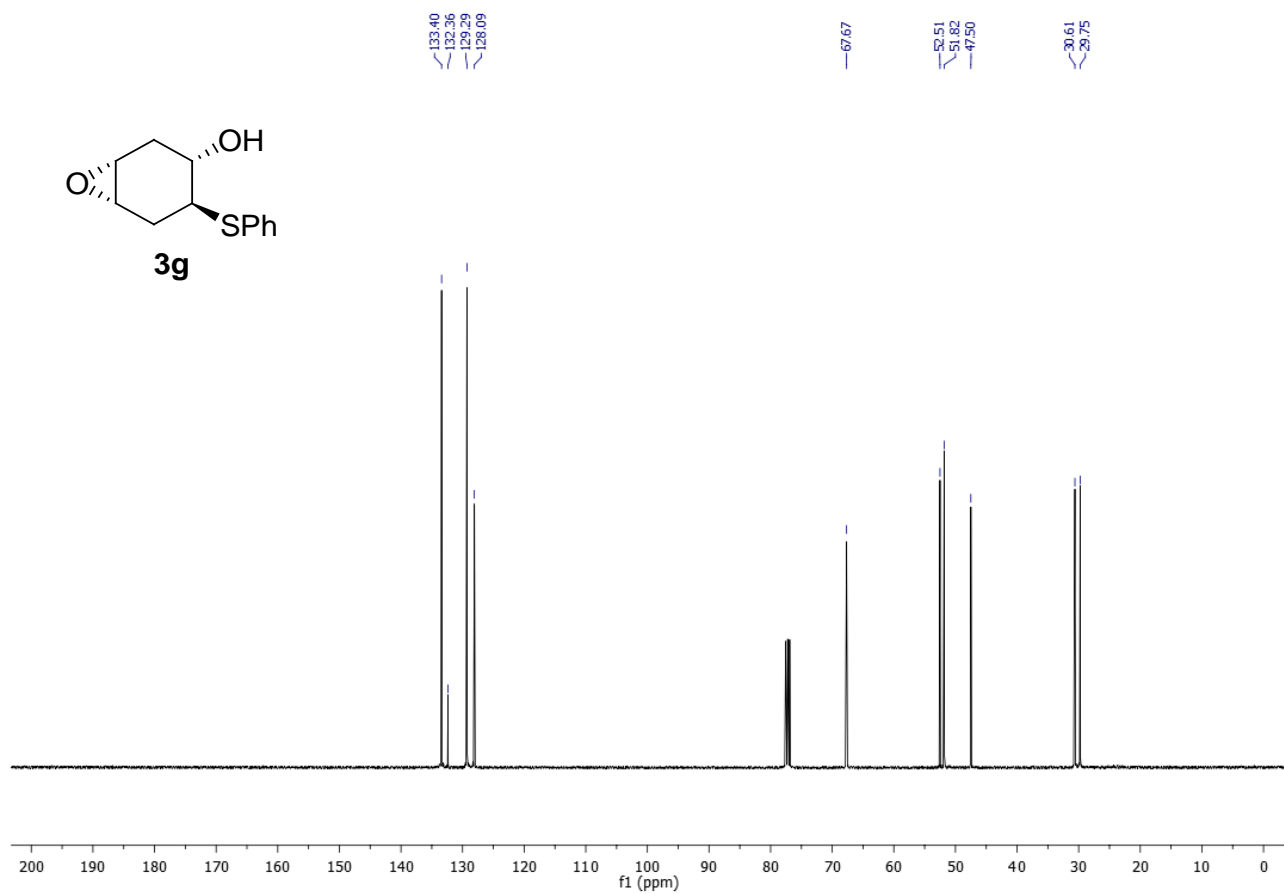

# Chromatogram : GI4-172(OD\_15)\_channel1

System : HPLC  
 Method : Ingle  
 User : User1

Acquired : 5/16/2012 4:10:53 PM  
 Processed : 5/16/2012 4:24:11 PM  
 Printed : 7/12/2012 11:01:26 PM

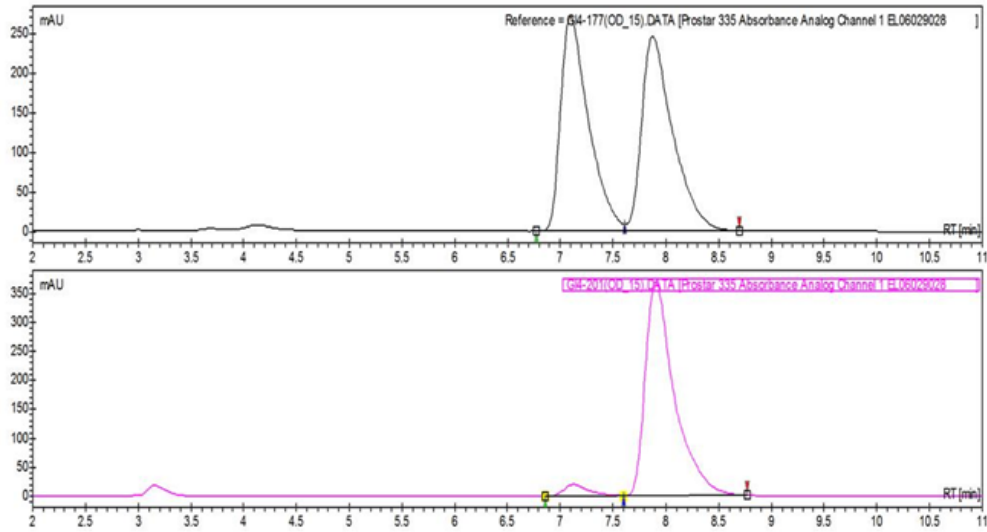

## Peak results :

GI4-177(OD\_15).DATA [Prostar 335 Absorbance Analog Channel 1 EL06029028 ]

| Index | Time [Min] | Height [mAU] | Width USP [Min] | Area [mAU.Min] | Area % [%] |
|-------|------------|--------------|-----------------|----------------|------------|
| 1     | 7.09       | 269.3        | 0.48            | 82.9           | 49.774     |
| 2     | 7.88       | 245.4        | 0.52            | 83.7           | 50.226     |
| Total |            | 514.7        |                 | 166.6          | 100.000    |

GI4-201(OD\_15).DATA [Prostar 335 Absorbance Analog Channel 1 EL06029028 ]

| Index | Time [Min] | Height [mAU] | Width USP [Min] | Area [mAU.Min] | Area % [%] |
|-------|------------|--------------|-----------------|----------------|------------|
| 1     | 7.12       | 20.0         | 0.42            | 5.5            | 4.437      |
| 2     | 7.91       | 371.3        | 0.46            | 118.6          | 95.563     |
| Total |            | 391.3        |                 | 124.1          | 100.000    |

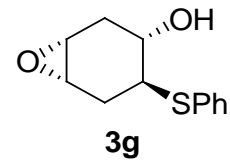

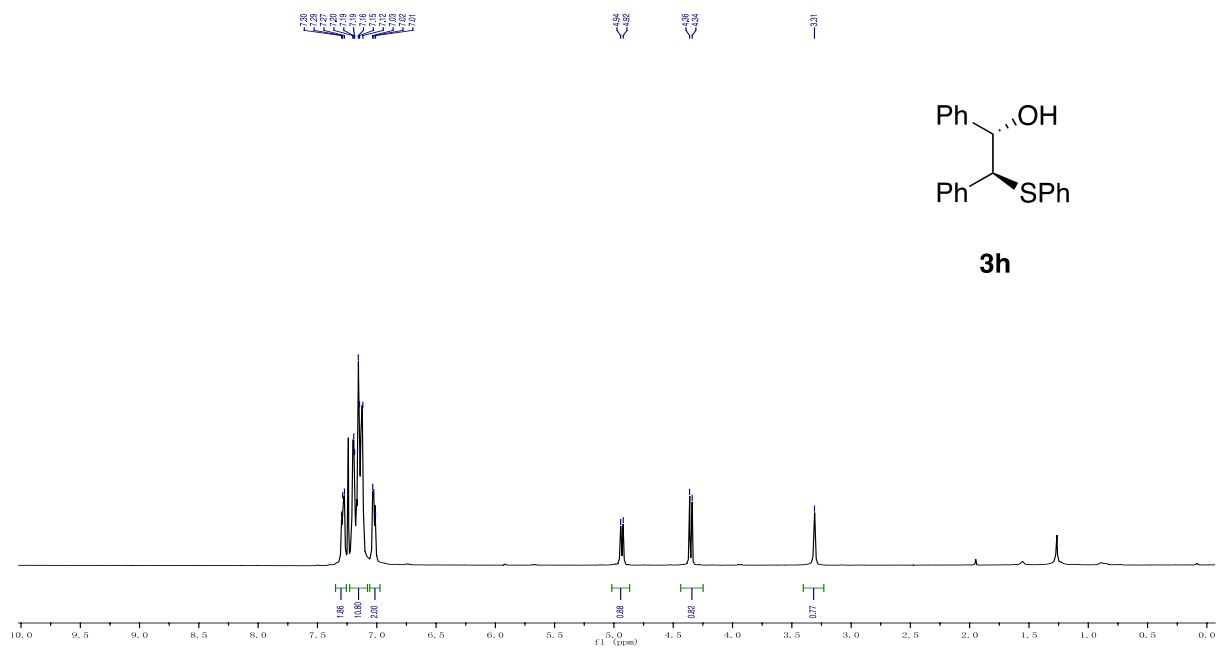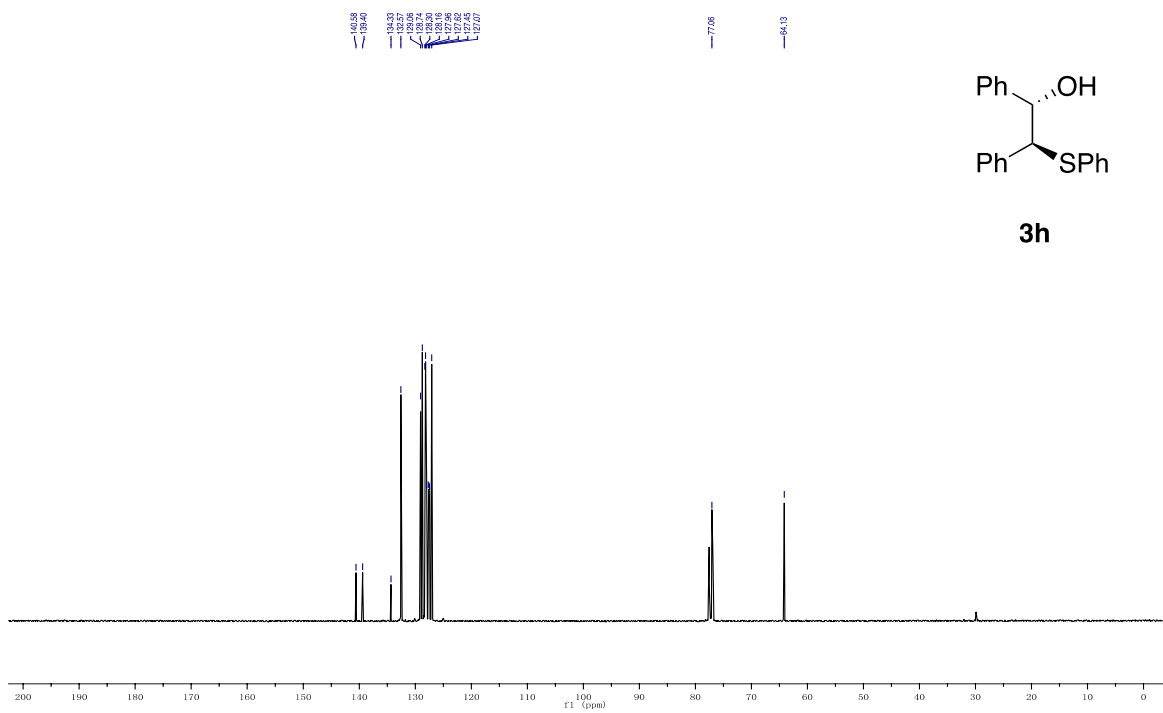



# Chromatogram : MM3-286\_OD-101\_channel1

System : HPLC  
 Method : Ingle  
 User : User1

Acquired : 11/2/2011 1:11:07 PM  
 Processed : 11/2/2011 1:32:34 PM  
 Printed : 8/24/2012 5:34:49 PM

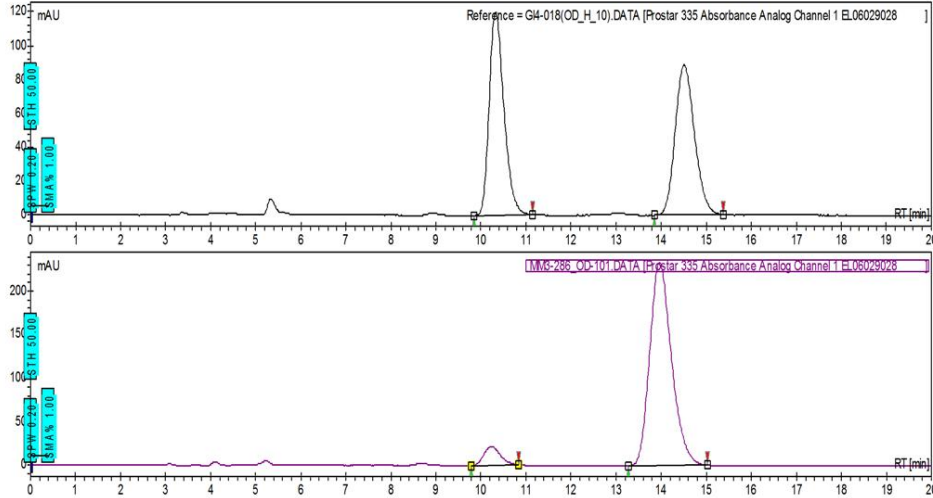

## Peak results :

GI4-018(OD\_H\_10).DATA [Prostar 335 Absorbance Analog Channel 1 EL06029028 ]

| Index | Time [Min] | Height [mAU] | Width USP [Min] | Area [mAU.Min] | Area % [%] |
|-------|------------|--------------|-----------------|----------------|------------|
| 1     | 10.32      | 119.7        | 0.60            | 45.4           | 50.673     |
| 2     | 14.51      | 88.7         | 0.79            | 44.2           | 49.327     |
| Total |            | 208.4        |                 | 89.5           | 100.000    |

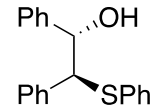

MM3-286\_OD-101.DATA [Prostar 335 Absorbance Analog Channel 1 EL06029028 ]

| Index | Time [Min] | Height [mAU] | Width USP [Min] | Area [mAU.Min] | Area % [%] |
|-------|------------|--------------|-----------------|----------------|------------|
| 1     | 10.23      | 21.8         | 0.67            | 9.1            | 6.486      |
| 2     | 13.96      | 233.2        | 0.89            | 130.7          | 93.514     |
| Total |            | 255.0        |                 | 139.8          | 100.000    |

**3h**

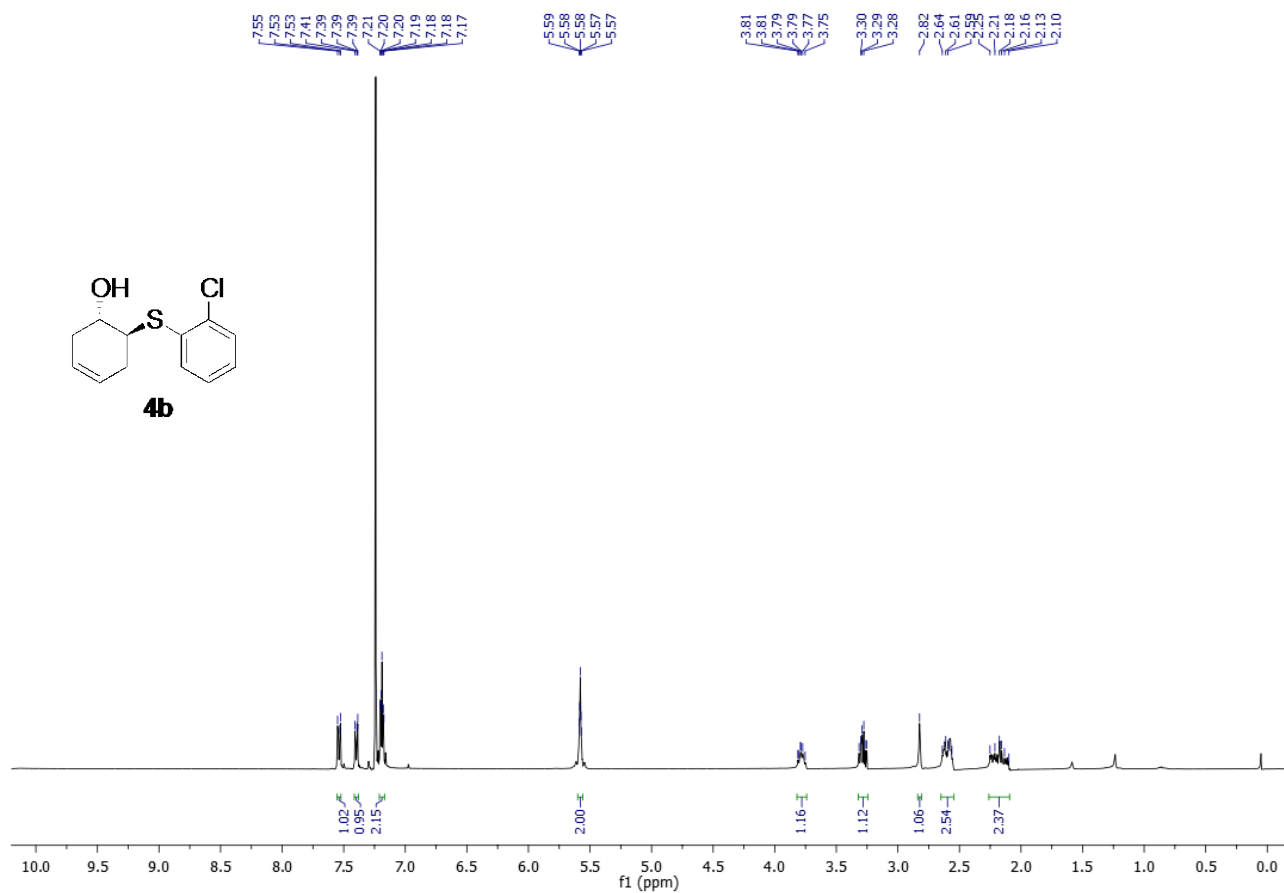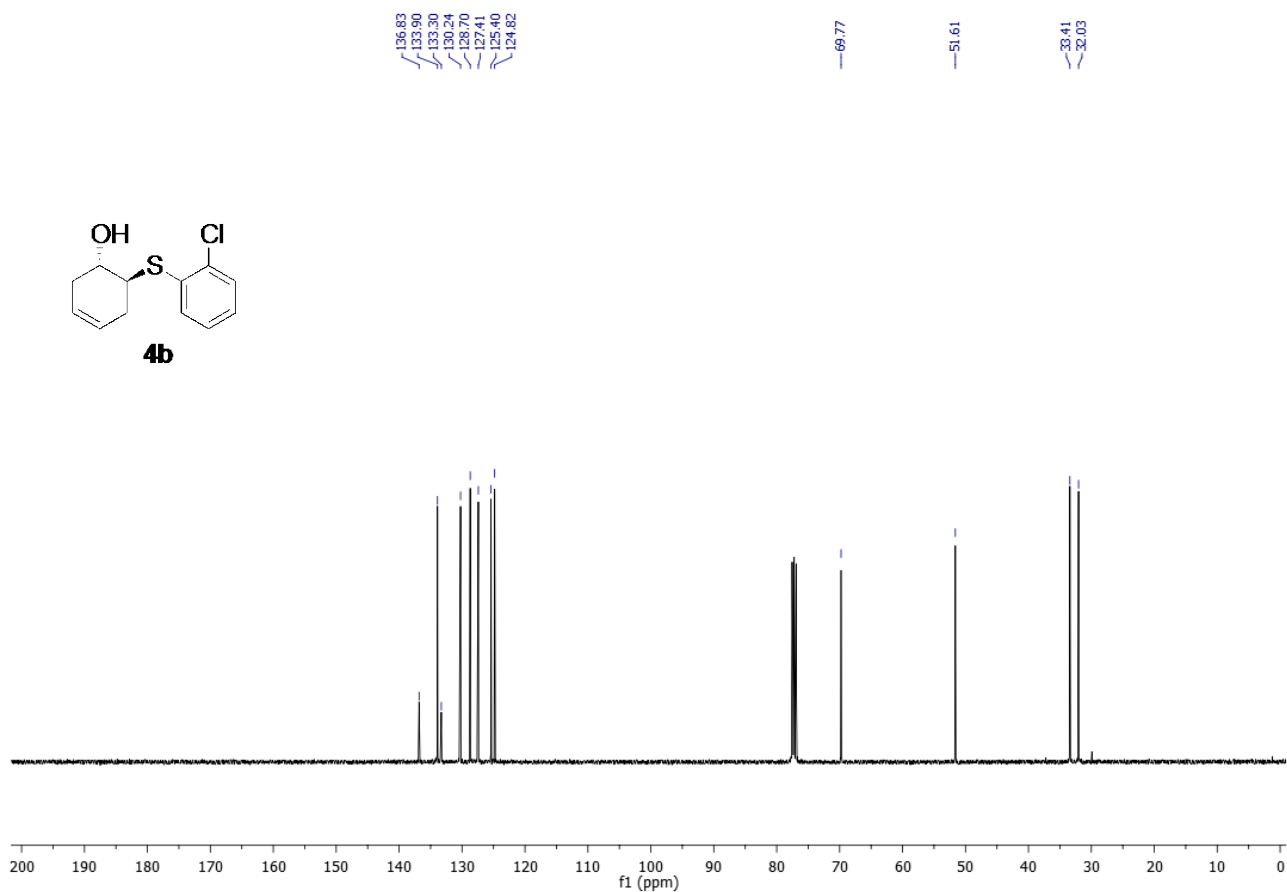

# Chromatogram : GI4-58(OD\_H\_10)\_channel1

System : HPLC  
Method : Ingle  
User : User1

Acquired : 10/15/2011 10:38:24 PM  
Processed : 10/15/2011 10:58:54 PM  
Printed : 7/17/2012 3:21:42 PM

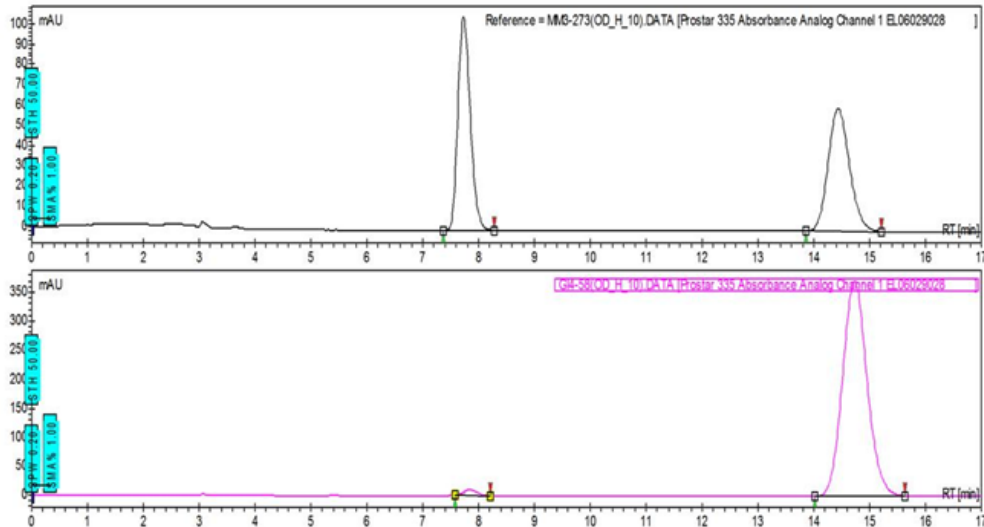

## Peak results :

MM3-273(OD\_H\_10).DATA [Prostar 335 Absorbance Analog Channel 1 EL06029028 ]

| Index | Time [Min] | Height [mAU] | Width USP [Min] | Area [mAU.Min] | Area % [%] |
|-------|------------|--------------|-----------------|----------------|------------|
| 1     | 7.73       | 105.5        | 0.41            | 27.1           | 50.108     |
| 2     | 14.44      | 60.6         | 0.71            | 27.0           | 49.892     |
| Total |            | 166.1        |                 | 54.2           | 100.000    |

GI4-58(OD\_H\_10).DATA [Prostar 335 Absorbance Analog Channel 1 EL06029028 ]

| Index | Time [Min] | Height [mAU] | Width USP [Min] | Area [mAU.Min] | Area % [%] |
|-------|------------|--------------|-----------------|----------------|------------|
| 1     | 7.85       | 10.0         | 0.44            | 2.7            | 1.407      |
| 2     | 14.73      | 370.0        | 0.81            | 188.3          | 98.593     |
| Total |            | 380.0        |                 | 191.0          | 100.000    |

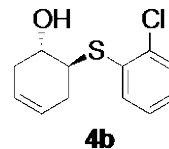

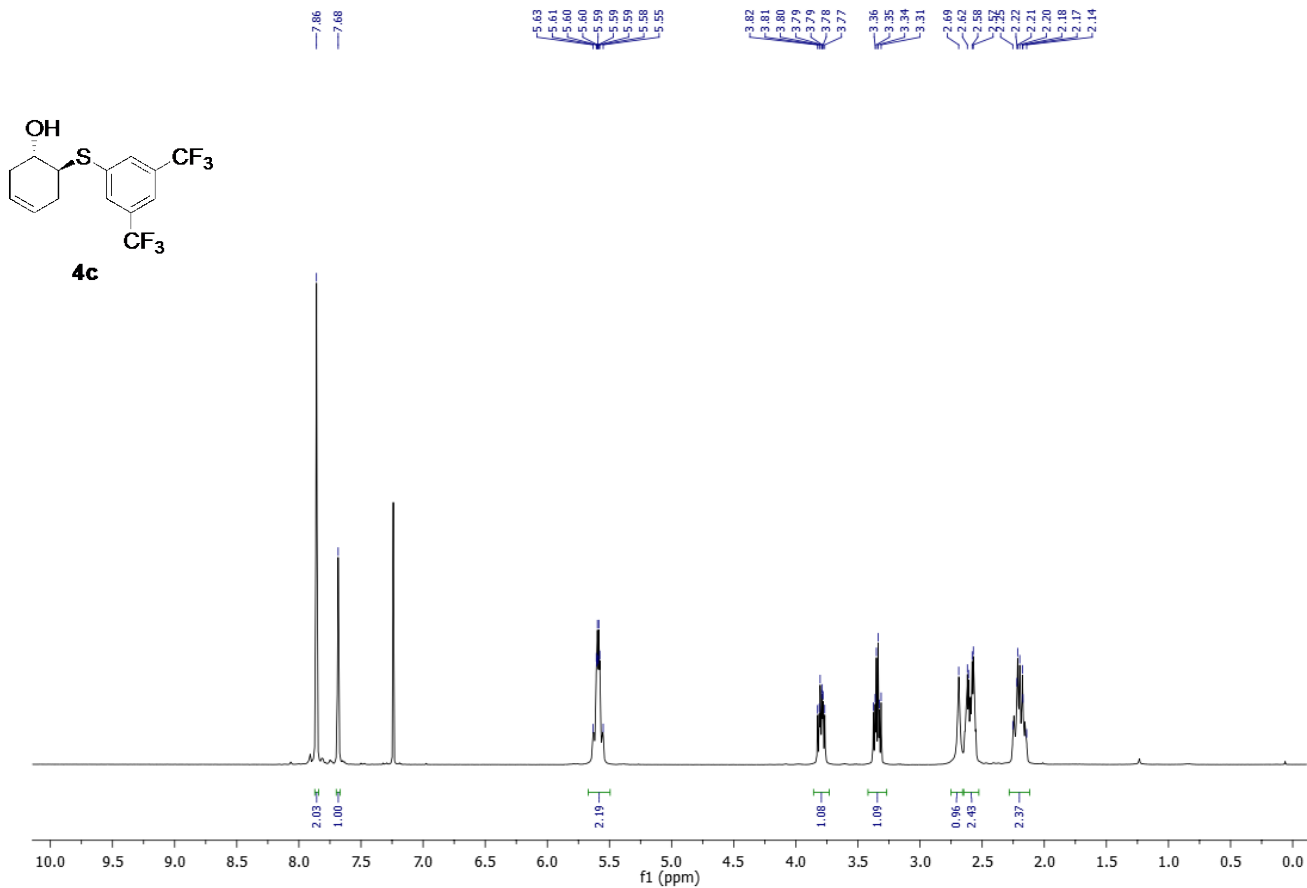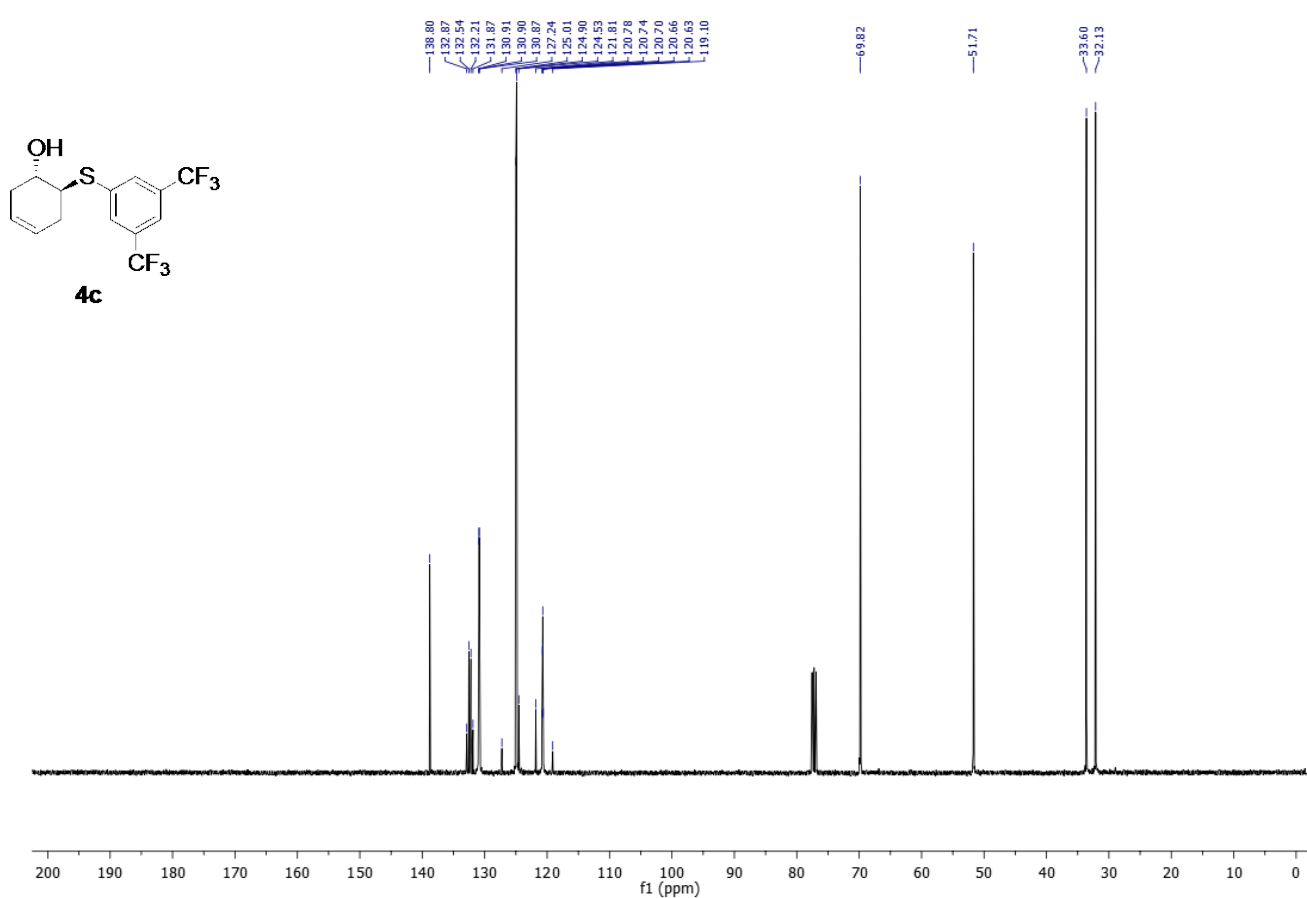

# Chromatogram : GI4-108\_OD\_10\_channel1

System : HPLC  
Method : Ingle  
User : User1

Acquired : 2/7/2012 11:34:19 PM  
Processed : 2/8/2012 9:58:44 AM  
Printed : 7/17/2012 3:23:28 PM

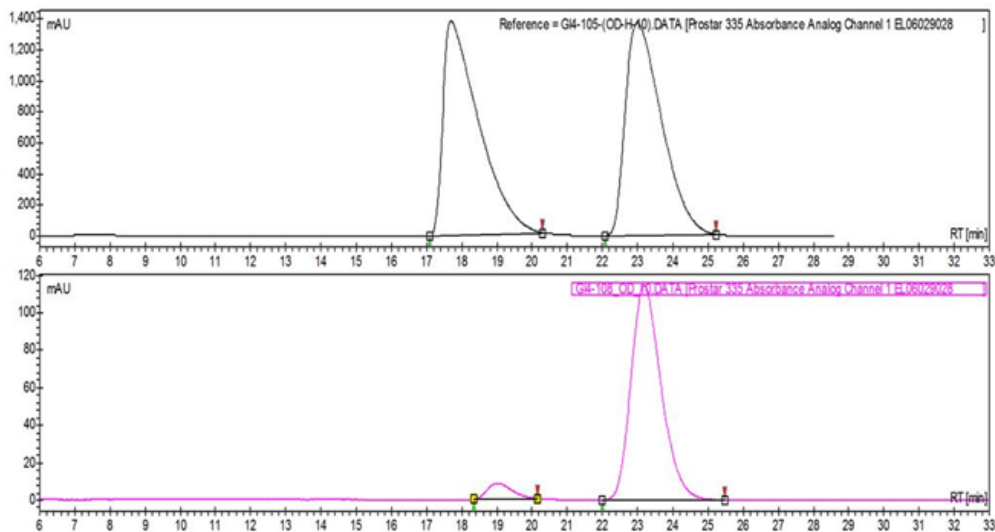

## Peak results :

GI4-105-(OD-H-10).DATA [Prostar 335 Absorbance Analog Channel 1 EL06029028 ]

| Index | Time [Min] | Height [mAU] | Width USP [Min] | Area [mAU.Min] | Area % [%] |
|-------|------------|--------------|-----------------|----------------|------------|
| 1     | 17.69      | 1379.6       | 1.92            | 1626.5         | 49.950     |
| 2     | 22.99      | 1367.3       | 1.91            | 1629.7         | 50.050     |
| Total |            | 2746.9       |                 | 3256.2         | 100.000    |

GI4-108\_OD\_10.DATA [Prostar 335 Absorbance Analog Channel 1 EL06029028 ]

| Index | Time [Min] | Height [mAU] | Width USP [Min] | Area [mAU.Min] | Area % [%] |
|-------|------------|--------------|-----------------|----------------|------------|
| 1     | 19.01      | 8.5          | 1.29            | 6.9            | 5.734      |
| 2     | 23.19      | 114.7        | 1.57            | 113.6          | 94.266     |
| Total |            | 123.2        |                 | 120.5          | 100.000    |

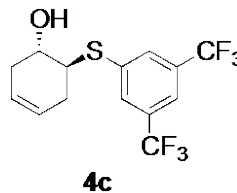

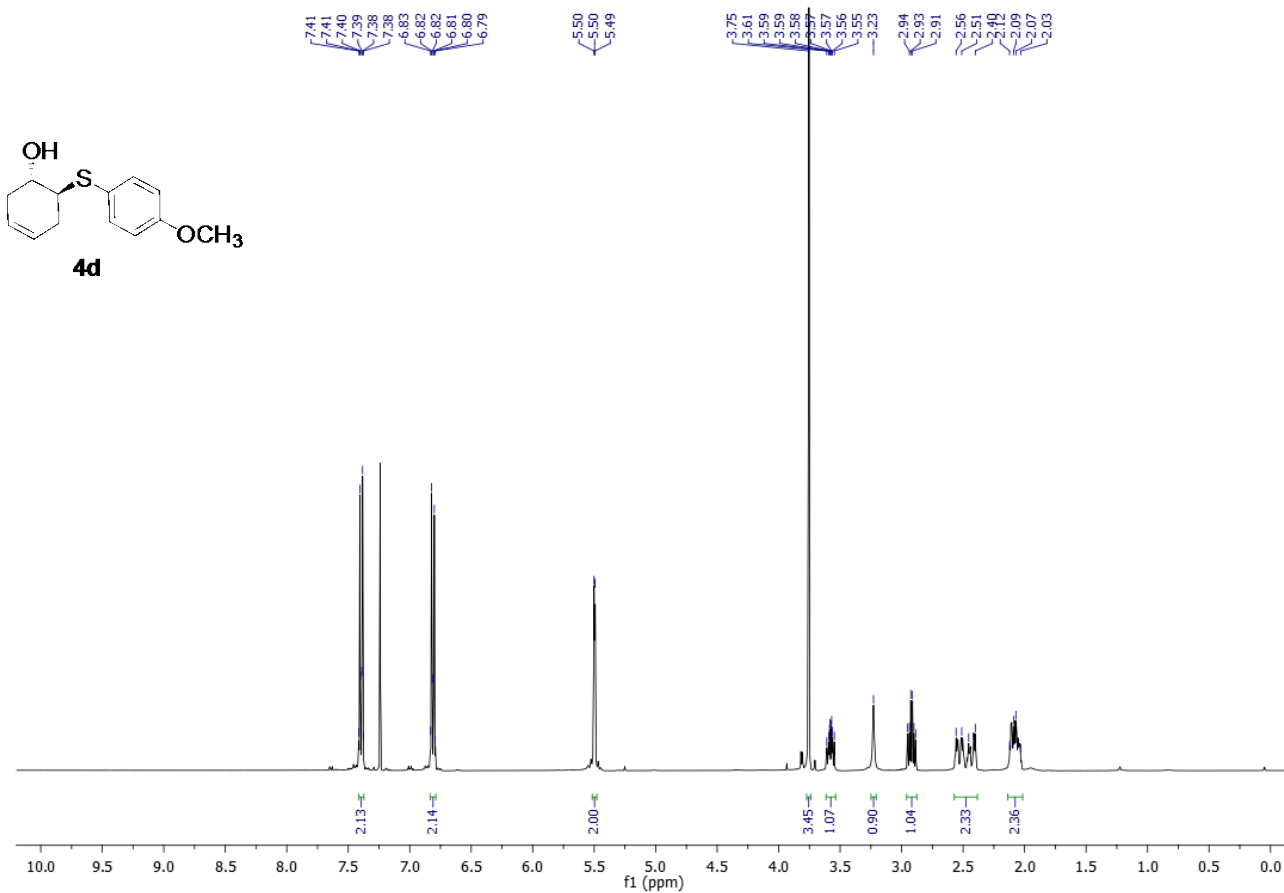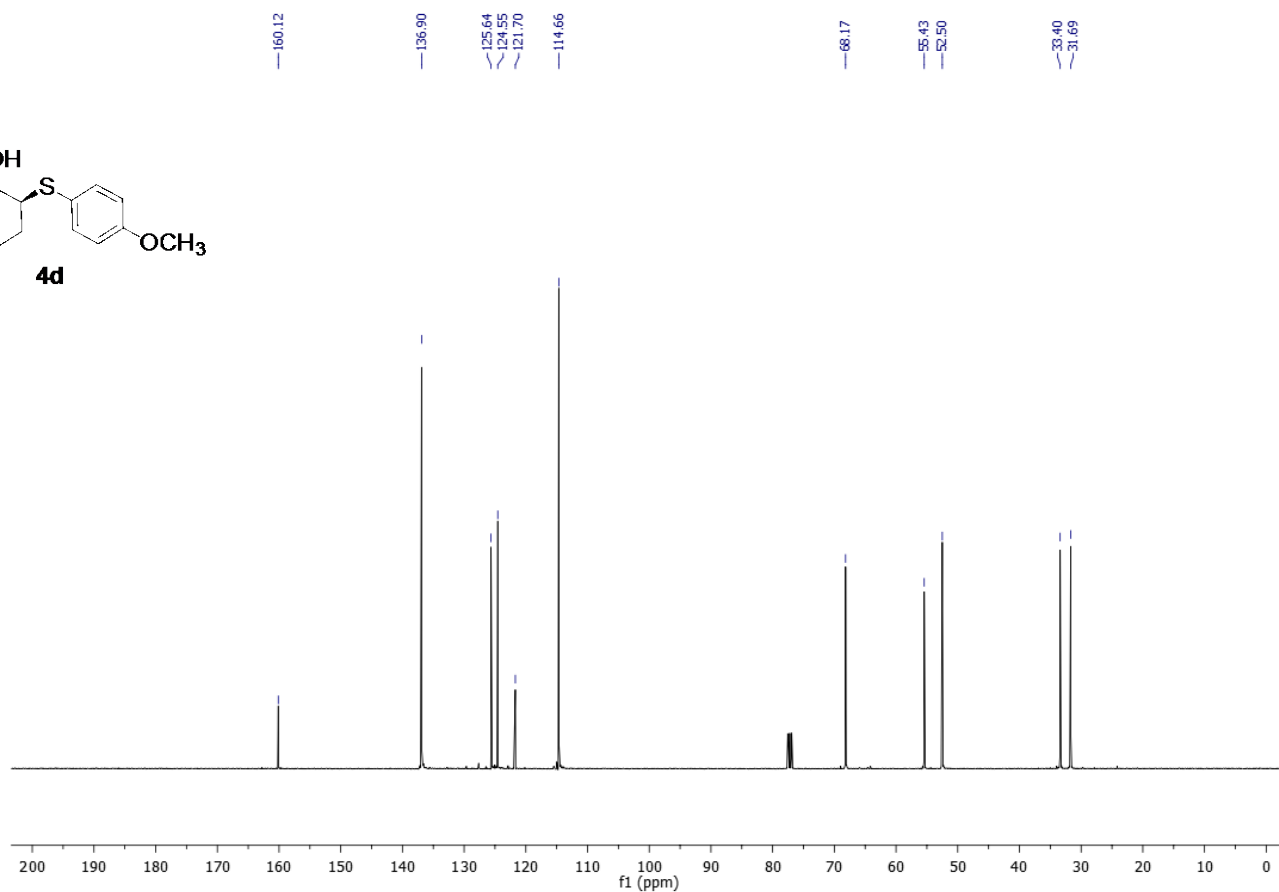

## Chromatogram : GI4-63O\_2\_0.52\_channel1

System : HPLC  
Method : Ingle  
User : User1

Acquired : 8/15/2012 7:40:56 PM  
Processed : 8/16/2012 1:51:22 PM  
Printed : 8/24/2012 2:53:22 PM

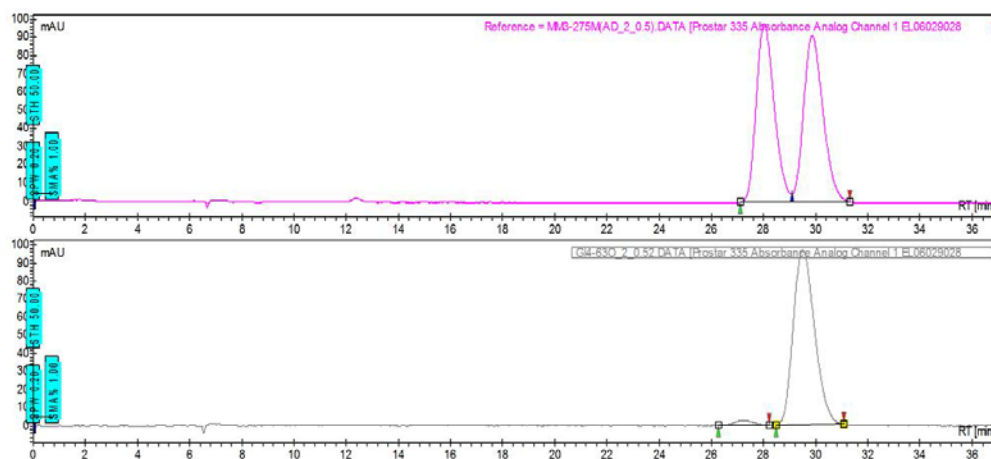

### Peak results :

MM3-275M(AD\_2\_0.5).DATA [Prostar 335 Absorbance Analog Channel 1 EL06029028 ]

| Index | Time [Min] | Height [mAU] | Width [Min] | USP [Min] | Area [mAU.Min] | Area % [%] |
|-------|------------|--------------|-------------|-----------|----------------|------------|
| 1     | 28.03      | 97.9         | 1.28        |           | 78.6           | 49.843     |
| 2     | 29.87      | 91.2         | 1.37        |           | 79.1           | 50.157     |
| Total |            | 189.1        |             |           | 157.6          | 100.000    |

GI4-63O\_2\_0.52.DATA [Prostar 335 Absorbance Analog Channel 1 EL06029028 ]

| Index | Time [Min] | Height [mAU] | Width [Min] | USP [Min] | Area [mAU.Min] | Area % [%] |
|-------|------------|--------------|-------------|-----------|----------------|------------|
| 2     | 27.17      | 2.9          | 1.32        |           | 2.3            | 2.471      |
| 1     | 29.51      | 97.1         | 1.51        |           | 91.9           | 97.529     |
| Total |            | 100.0        |             |           | 94.2           | 100.000    |

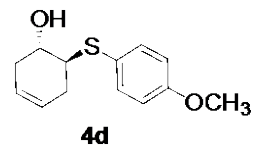

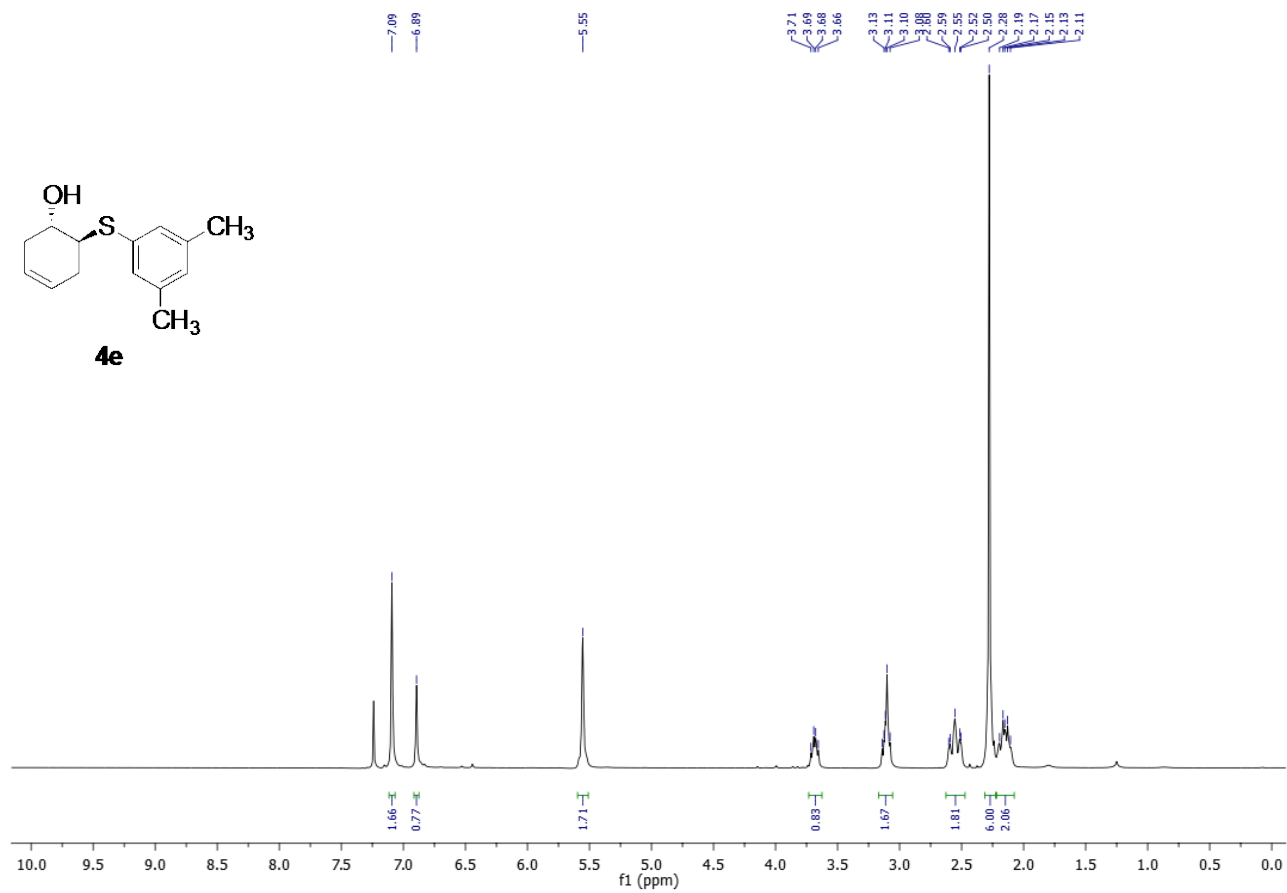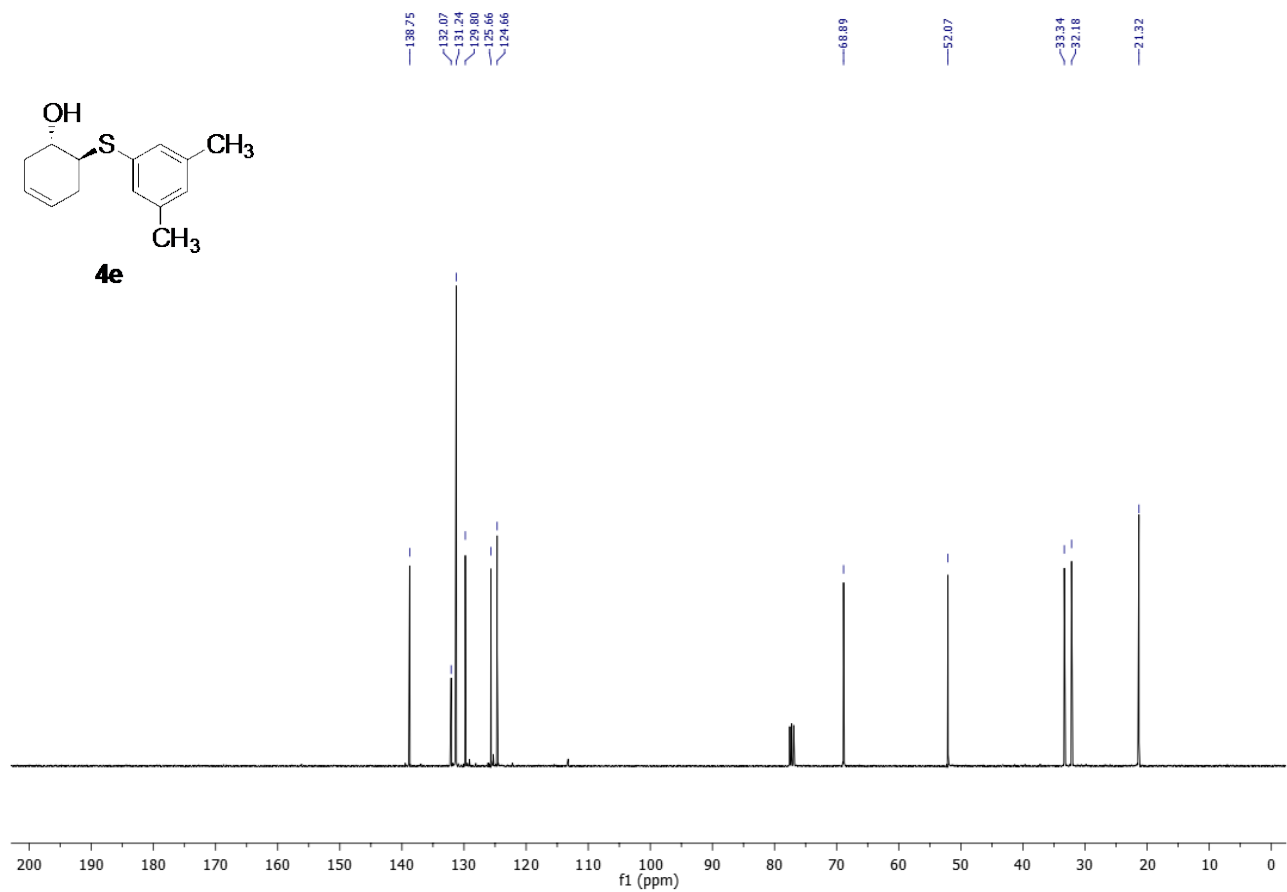



# Chromatogram : G14-72(OD\_H\_10)\_channel1

System : HPLC  
Method : Ingle  
User : User1

Acquired : 10/28/2011 4:21:00 PM  
Processed : 10/28/2011 4:37:35 PM  
Printed : 7/17/2012 3:25:46 PM

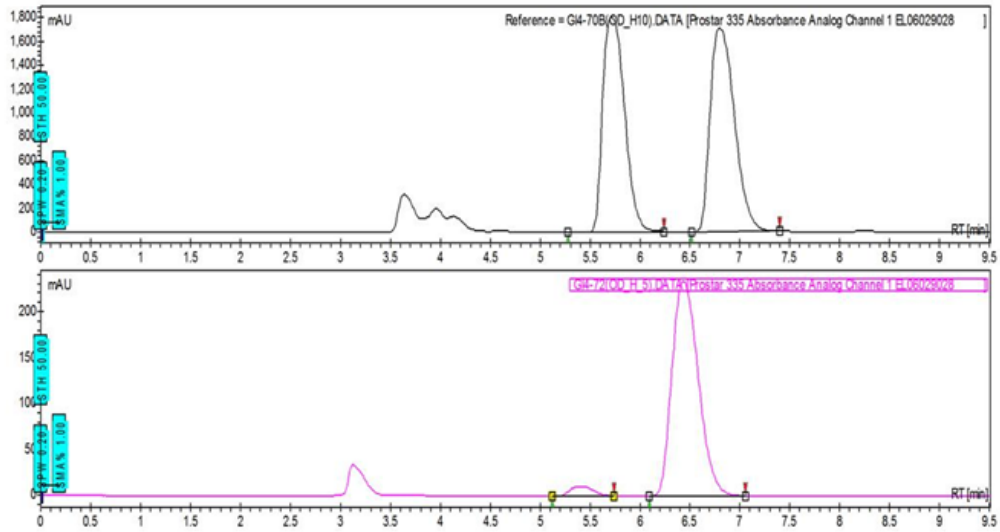

## Peak results :

G14-70B(OD\_H10).DATA [Prostar 335 Absorbance Analog Channel 1 EL06029028 ]

| Index | Time [Min] | Height [mAU] | Width USP [Min] | Area [mAU.Min] | Area % [%] |
|-------|------------|--------------|-----------------|----------------|------------|
| 1     | 5.72       | 1799.3       | 0.37            | 453.5          | 48.467     |
| 2     | 6.80       | 1707.6       | 0.43            | 482.2          | 51.533     |
| Total |            | 3506.9       |                 | 935.6          | 100.000    |

G14-72(OD\_H\_5).DATA [Prostar 335 Absorbance Analog Channel 1 EL06029028 ]

| Index | Time [Min] | Height [mAU] | Width USP [Min] | Area [mAU.Min] | Area % [%] |
|-------|------------|--------------|-----------------|----------------|------------|
| 1     | 5.40       | 11.2         | 0.42            | 2.9            | 3.948      |
| 2     | 6.43       | 234.8        | 0.48            | 71.7           | 96.052     |
| Total |            | 245.9        |                 | 74.7           | 100.000    |

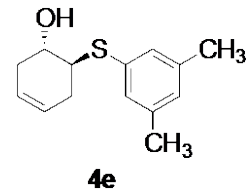

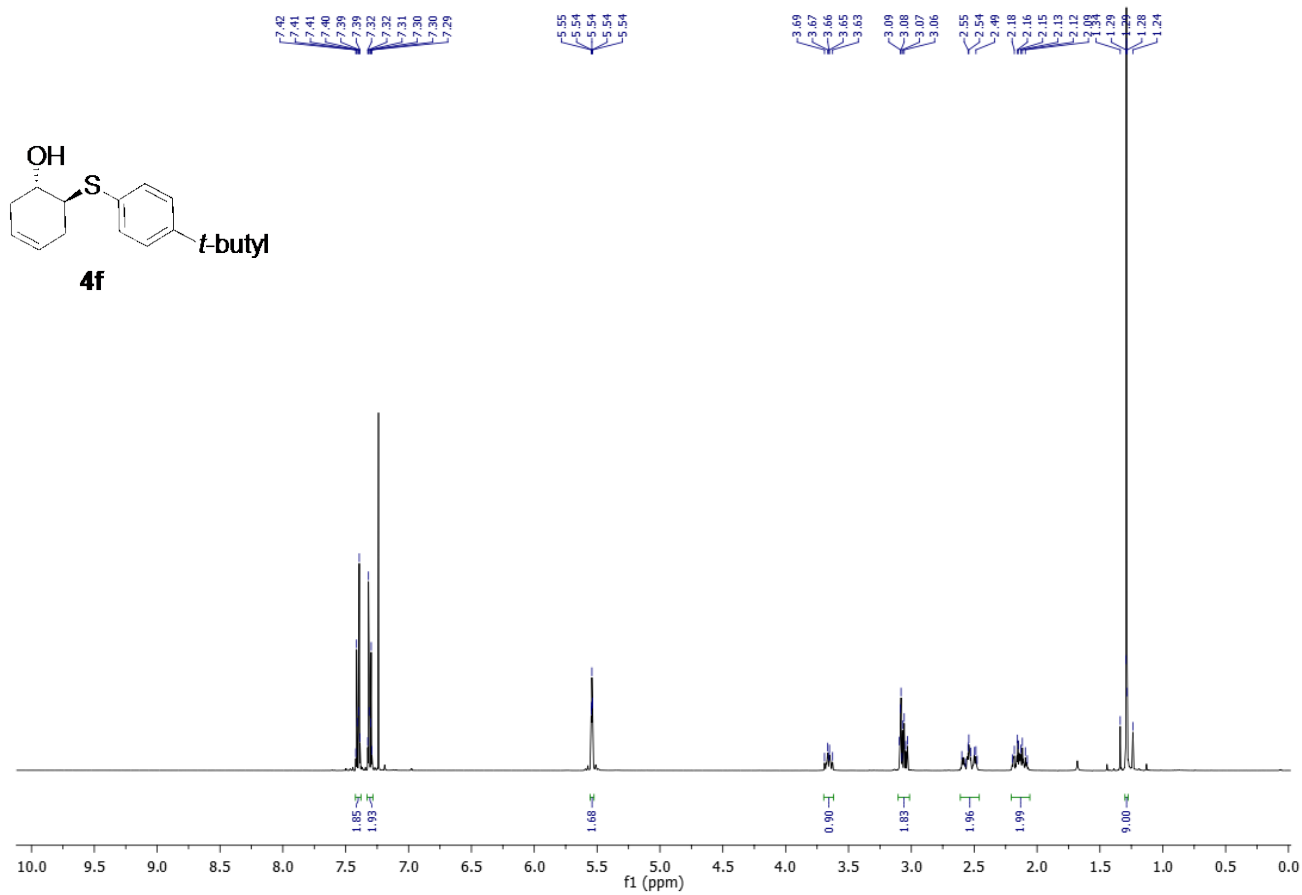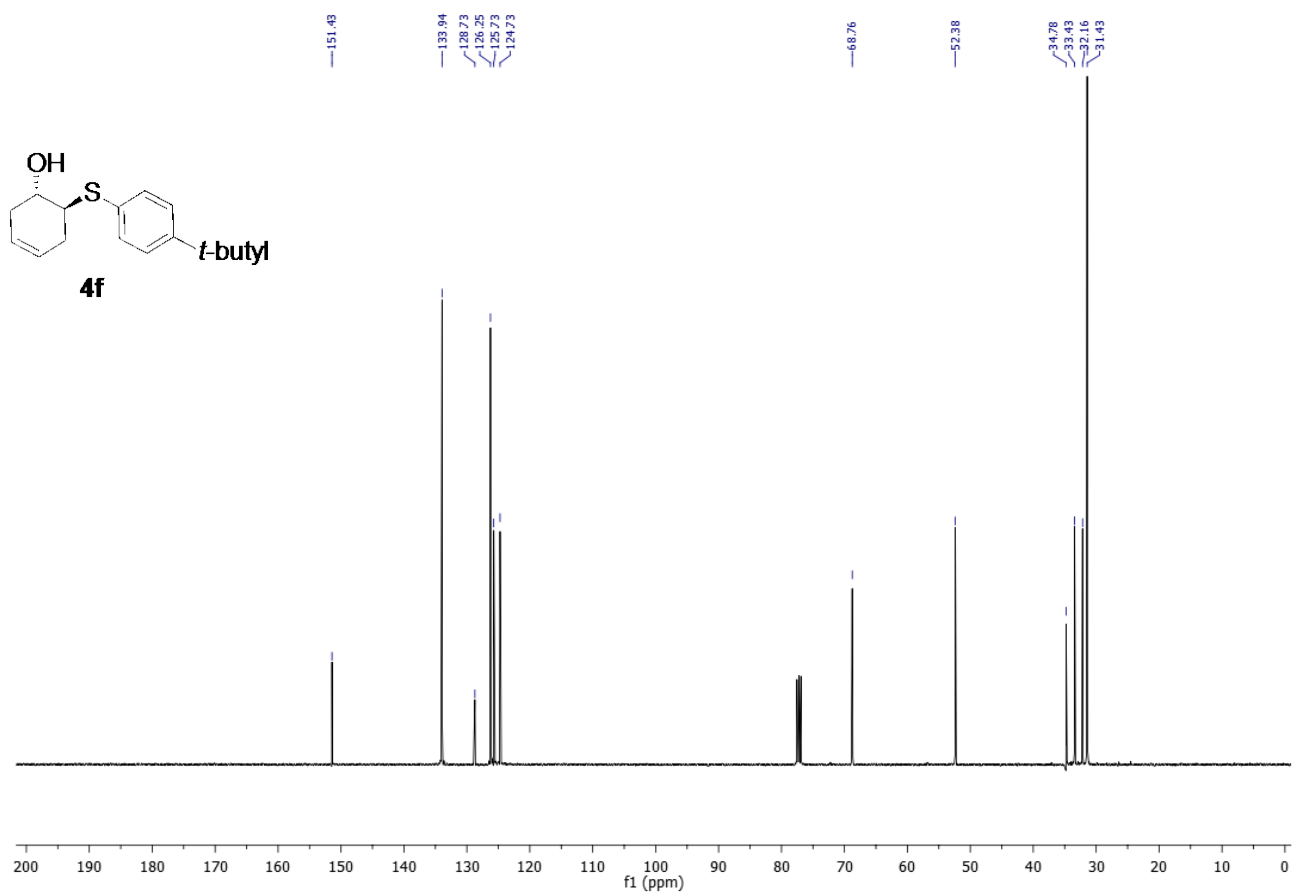

# Chromatogram : GI5-135C(AD\_10)\_channel1

System : HPLC  
Method : Ingle  
User : User1

Acquired : 3/7/2012 5:46:12 PM  
Processed : 3/7/2012 6:29:18 PM  
Printed : 7/17/2012 3:31:06 PM

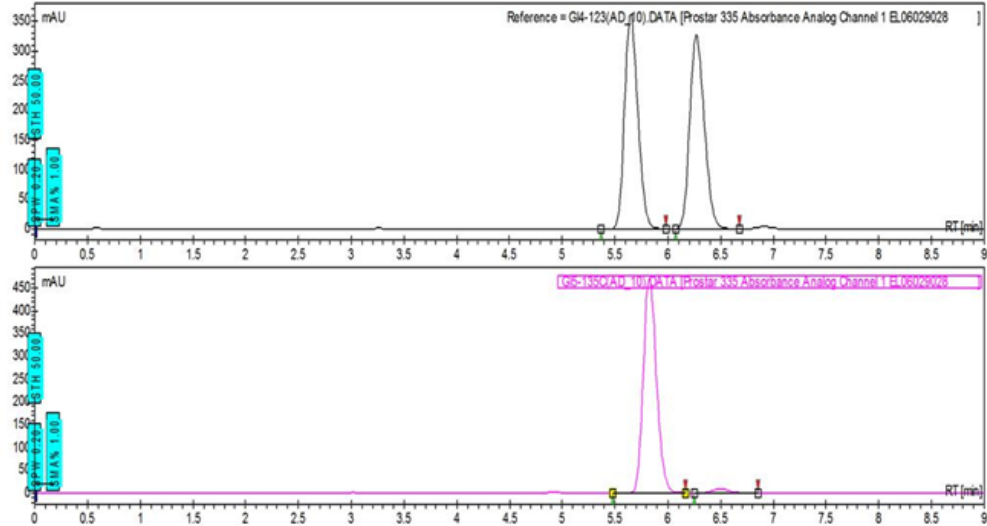

## Peak results :

GI4-123(AD\_10).DATA [Prostar 335 Absorbance Analog Channel 1 EL06029028 ]

| Index | Time [Min] | Height [mAU] | Width USP [Min] | Area [mAU.Min] | Area % [%] |
|-------|------------|--------------|-----------------|----------------|------------|
| 1     | 5.65       | 362.1        | 0.24            | 53.0           | 50.346     |
| 2     | 6.27       | 325.9        | 0.26            | 52.2           | 49.654     |
| Total |            | 688.1        |                 | 105.2          | 100.000    |

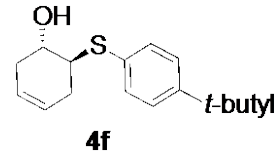

GI5-135C(AD\_10).DATA [Prostar 335 Absorbance Analog Channel 1 EL06029028 ]

| Index | Time [Min] | Height [mAU] | Width USP [Min] | Area [mAU.Min] | Area % [%] |
|-------|------------|--------------|-----------------|----------------|------------|
| 1     | 5.83       | 469.3        | 0.24            | 68.6           | 97.944     |
| 2     | 6.49       | 9.0          | 0.26            | 1.4            | 2.056      |
| Total |            | 478.3        |                 | 70.0           | 100.000    |

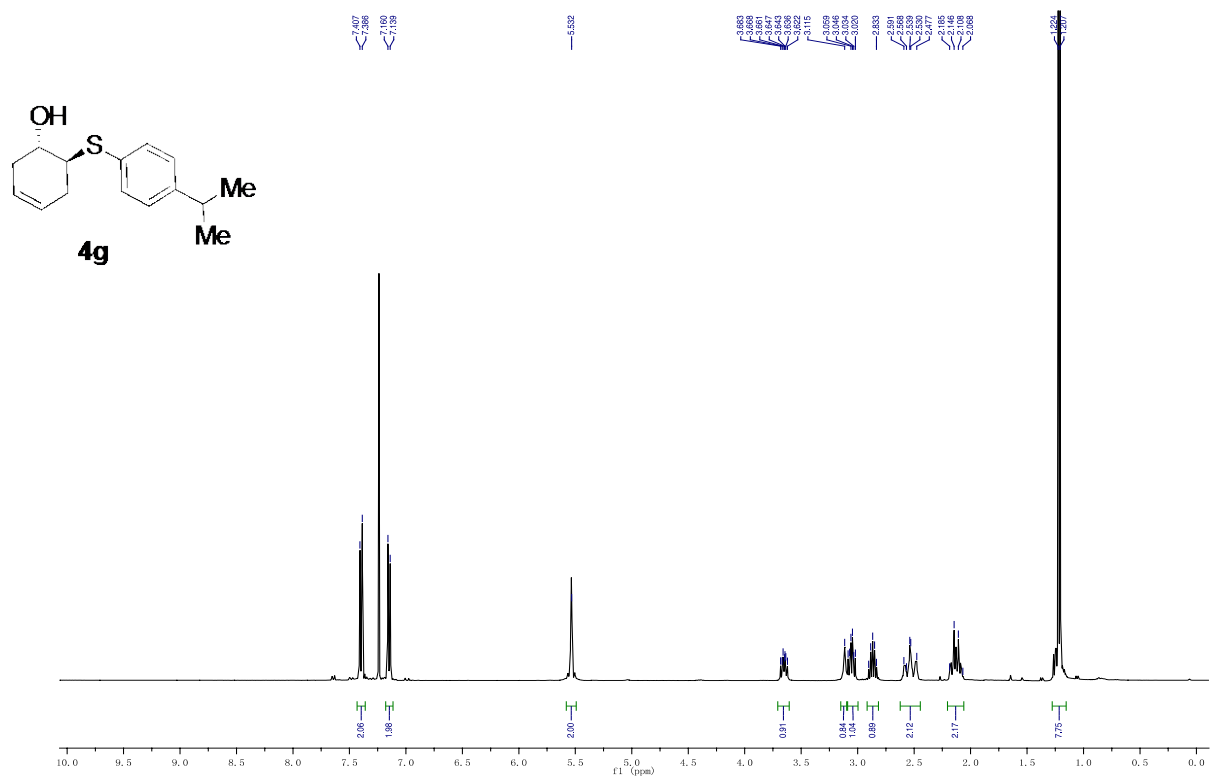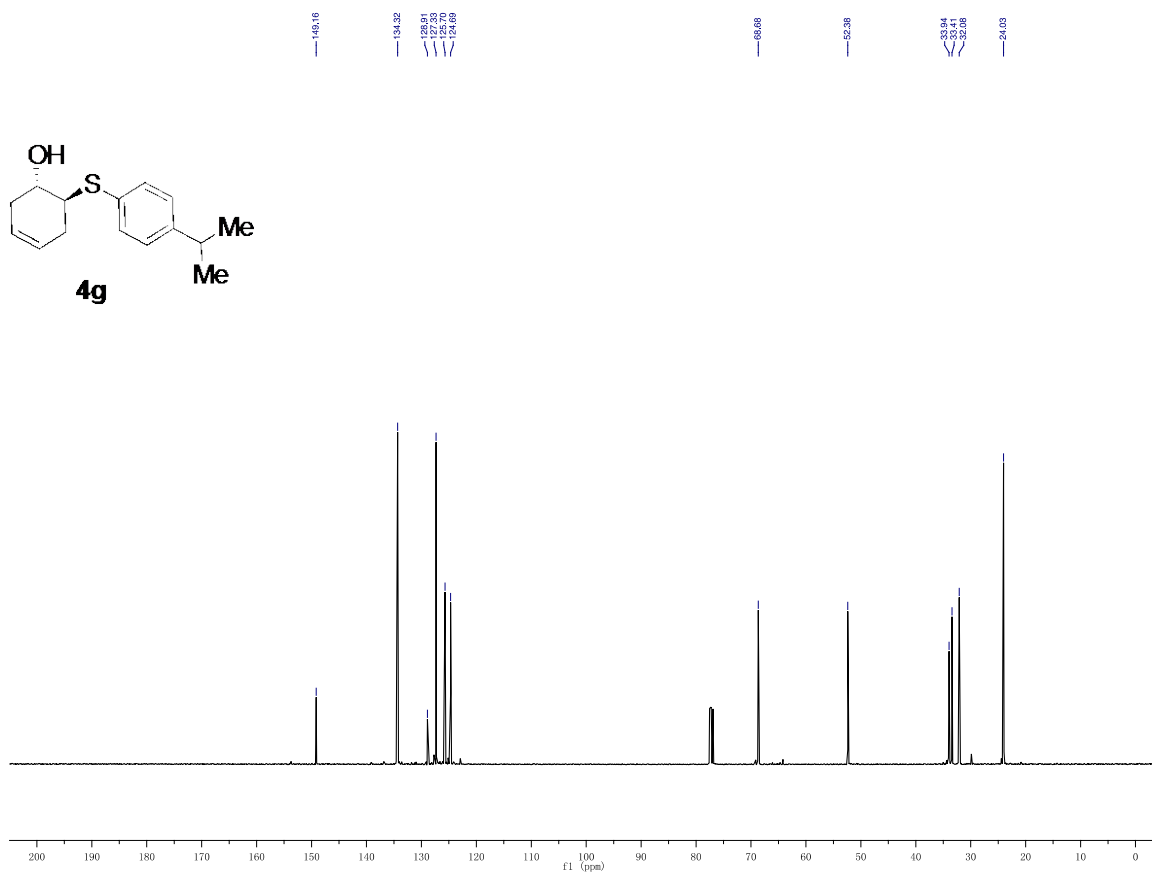

# Chromatogram : GI4-80F(AD\_4\_0.5)\_channel1

System : HPLC  
Method : Ingle  
User : User1

Acquired : 7/19/2012 6:55:26 PM  
Processed : 7/19/2012 9:32:38 PM  
Printed : 7/19/2012 9:45:01 PM

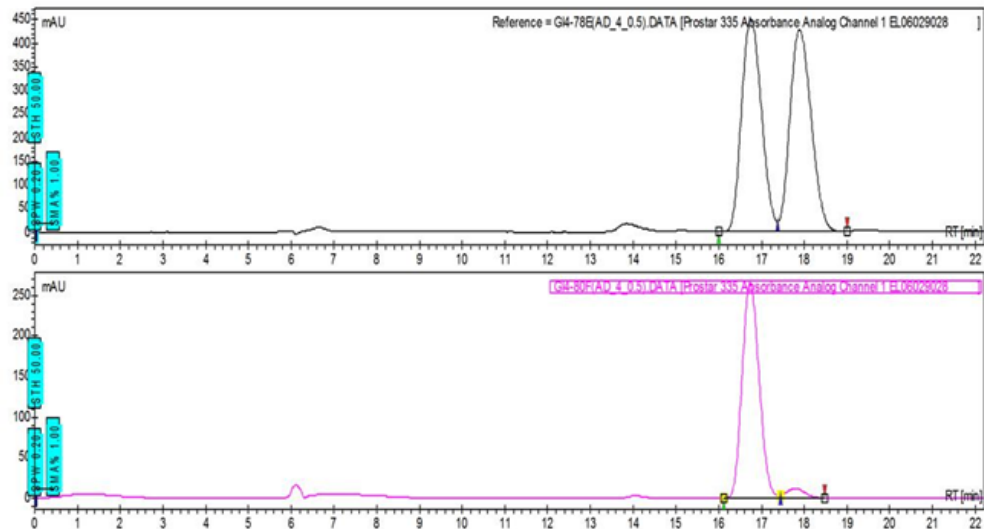

## Peak results :

GI4-78E(AD\_4\_0.5).DATA [Prostar 335 Absorbance Analog Channel 1 EL06029028 ]

| Index | Time [Min] | Height [mAU] | Width USP [Min] | Area [mAU.Min] | Area % [%] |
|-------|------------|--------------|-----------------|----------------|------------|
| 1     | 16.75      | 450.8        | 0.87            | 244.1          | 49.754     |
| 2     | 17.89      | 427.5        | 0.92            | 246.5          | 50.246     |
| Total |            | 878.3        |                 | 490.6          | 100.000    |

GI4-80F(AD\_4\_0.5).DATA [Prostar 335 Absorbance Analog Channel 1 EL06029028 ]

| Index | Time [Min] | Height [mAU] | Width USP [Min] | Area [mAU.Min] | Area % [%] |
|-------|------------|--------------|-----------------|----------------|------------|
| 1     | 16.73      | 264.9        | 0.74            | 122.6          | 95.445     |
| 2     | 17.79      | 11.8         | 0.76            | 5.9            | 4.555      |
| Total |            | 276.7        |                 | 128.5          | 100.000    |

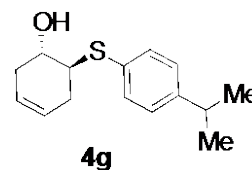

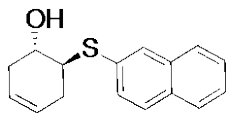

4h

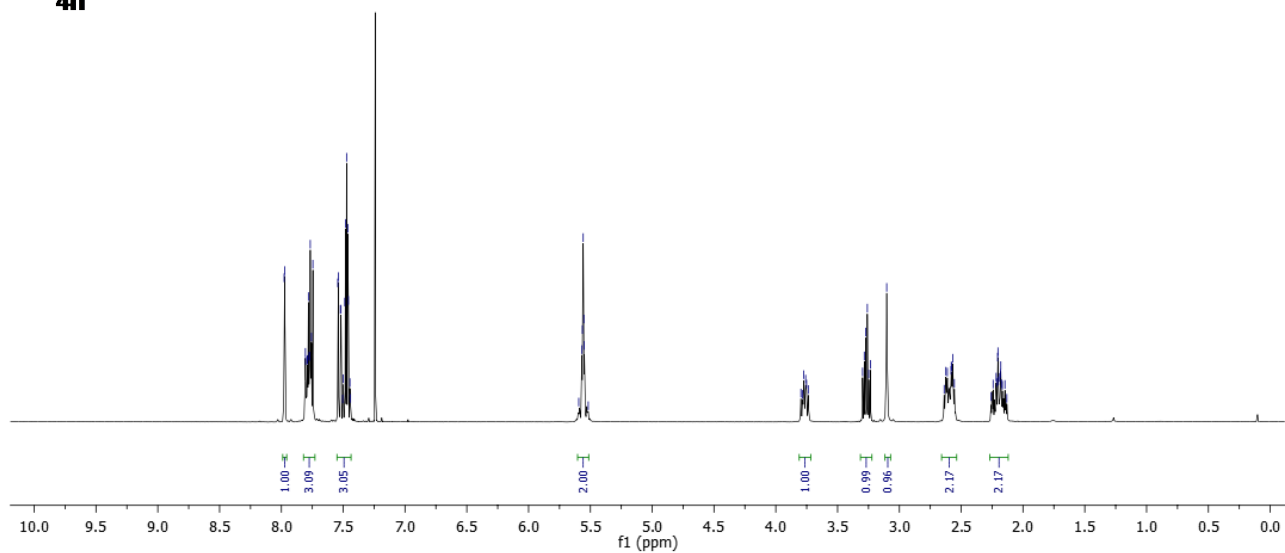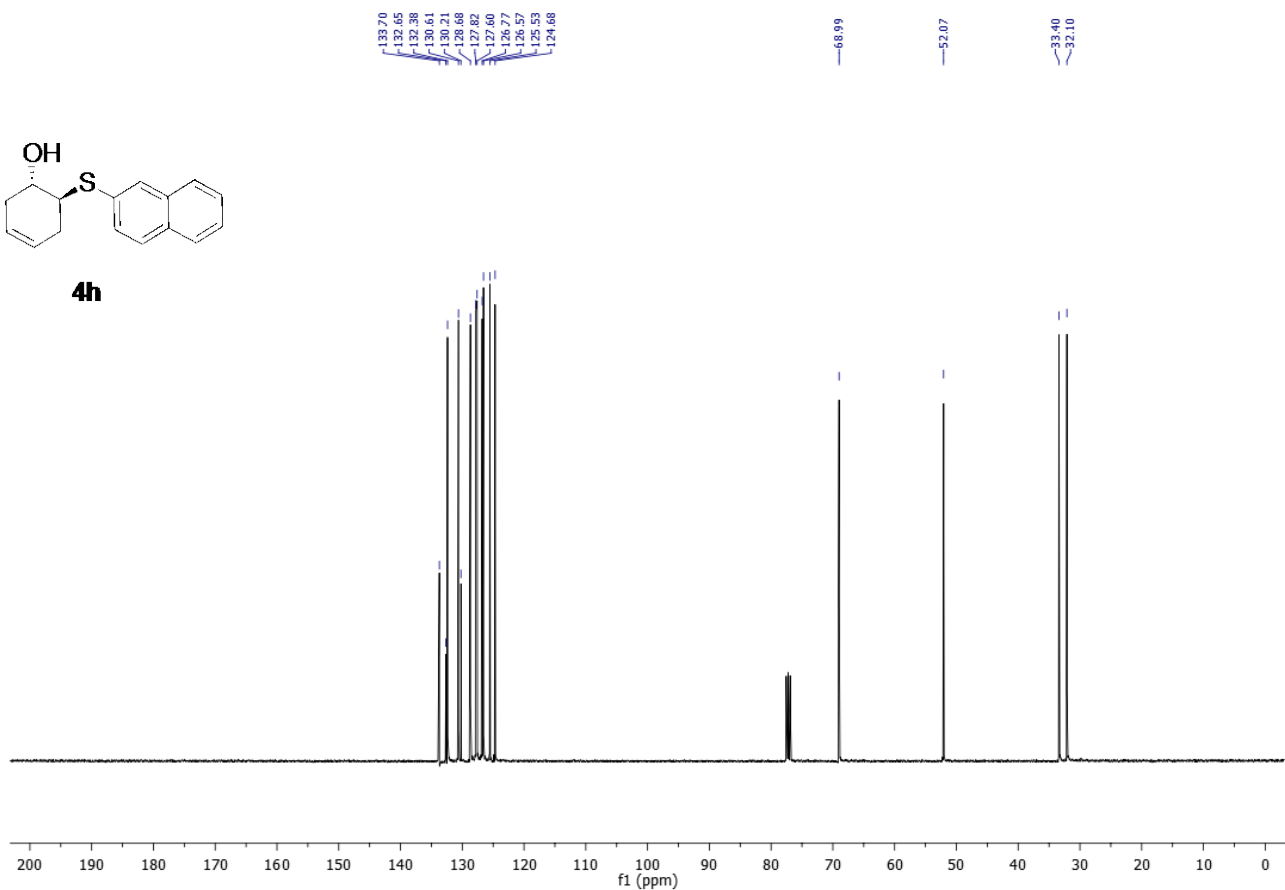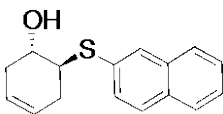

4h

# Chromatogram : GI3-59(OD\_H\_10)\_channel1

System : HPLC  
Method : Ingle  
User : User1

Acquired : 10/15/2011 11:02:47 PM  
Processed : 10/15/2011 11:45:21 PM  
Printed : 7/17/2012 3:33:27 PM

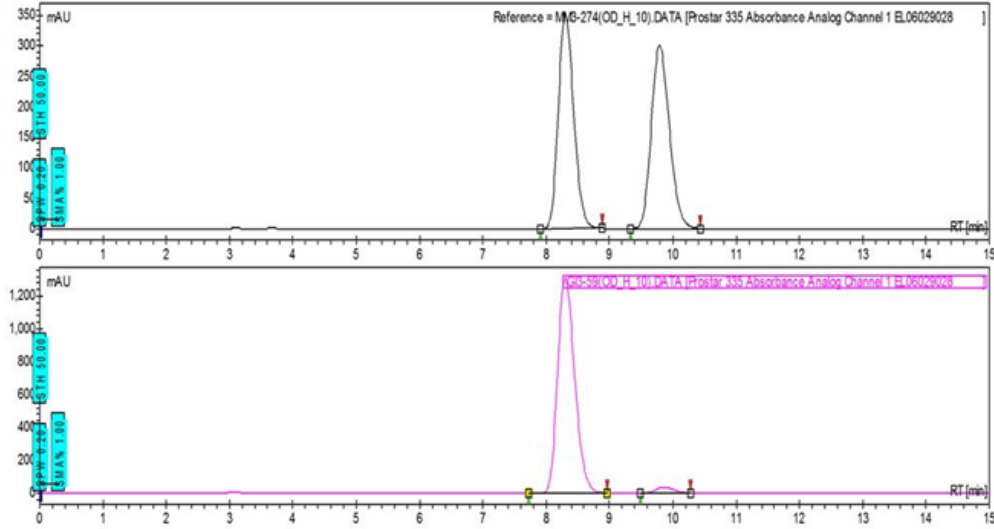

## Peak results :

MM3-274(OD\_H\_10).DATA [Prostar 335 Absorbance Analog Channel 1 EL06029028 ]

| Index | Time [Min] | Height [mAU] | Width USP [Min] | Area [mAU.Min] | Area % [%] |
|-------|------------|--------------|-----------------|----------------|------------|
| 1     | 8.31       | 352.4        | 0.45            | 99.5           | 49.957     |
| 2     | 9.79       | 300.4        | 0.53            | 99.6           | 50.043     |
| Total |            | 652.8        |                 | 199.1          | 100.000    |

GI3-59(OD\_H\_10).DATA [Prostar 335 Absorbance Analog Channel 1 EL06029028 ]

| Index | Time [Min] | Height [mAU] | Width USP [Min] | Area [mAU.Min] | Area % [%] |
|-------|------------|--------------|-----------------|----------------|------------|
| 1     | 8.31       | 1308.6       | 0.50            | 410.4          | 97.221     |
| 2     | 9.87       | 35.1         | 0.54            | 11.7           | 2.779      |
| Total |            | 1343.7       |                 | 422.1          | 100.000    |

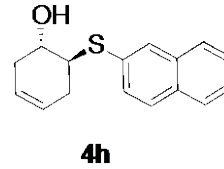

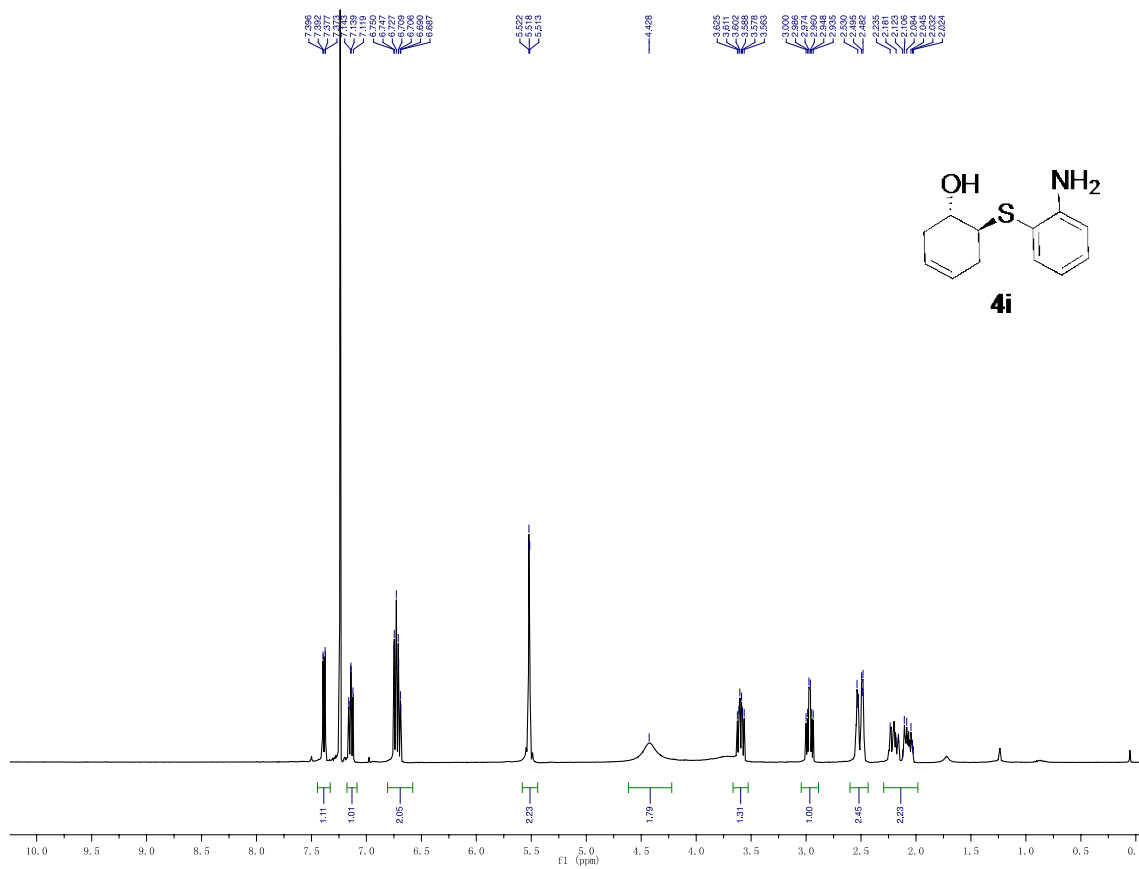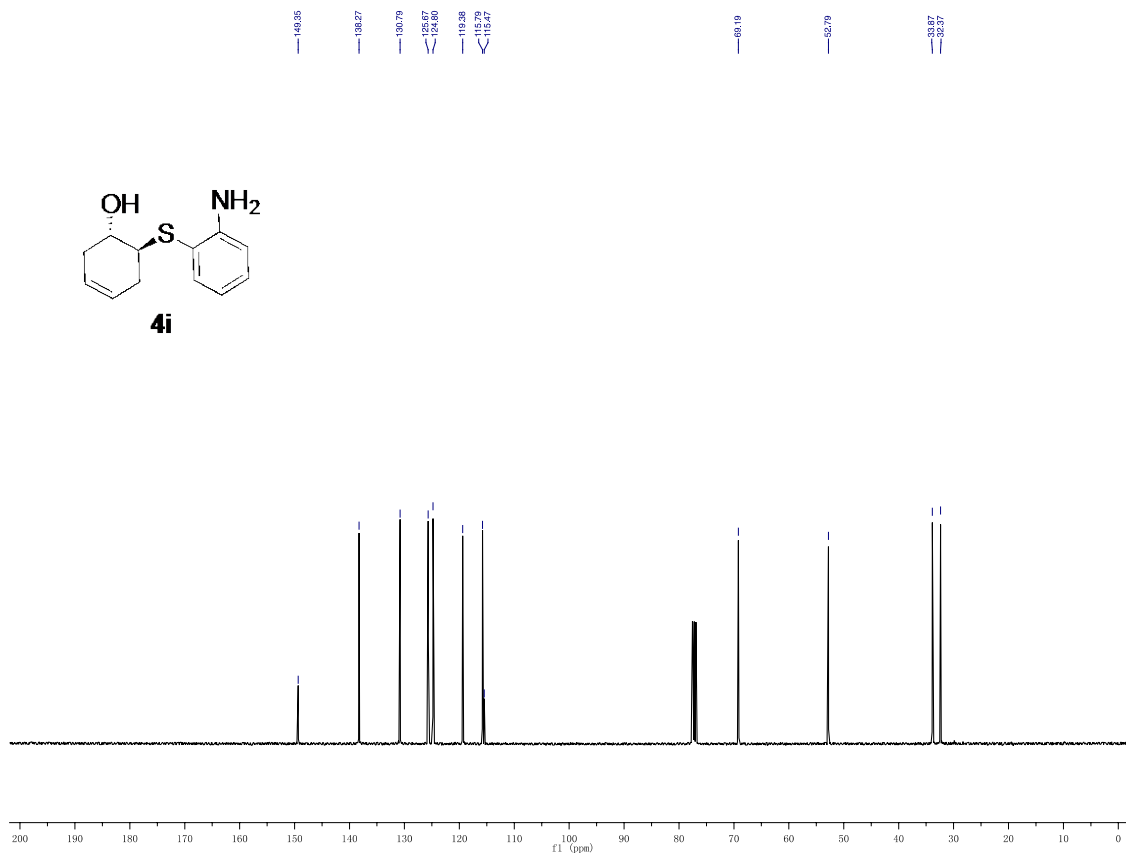



# Chromatogram : GI4-113\_AD\_10\_channel1

System : HPLC  
Method : Ingle  
User : User1

Acquired : 2/13/2012 3:58:45 PM  
Processed : 7/17/2012 3:36:06 PM  
Printed : 7/17/2012 3:37:52 PM

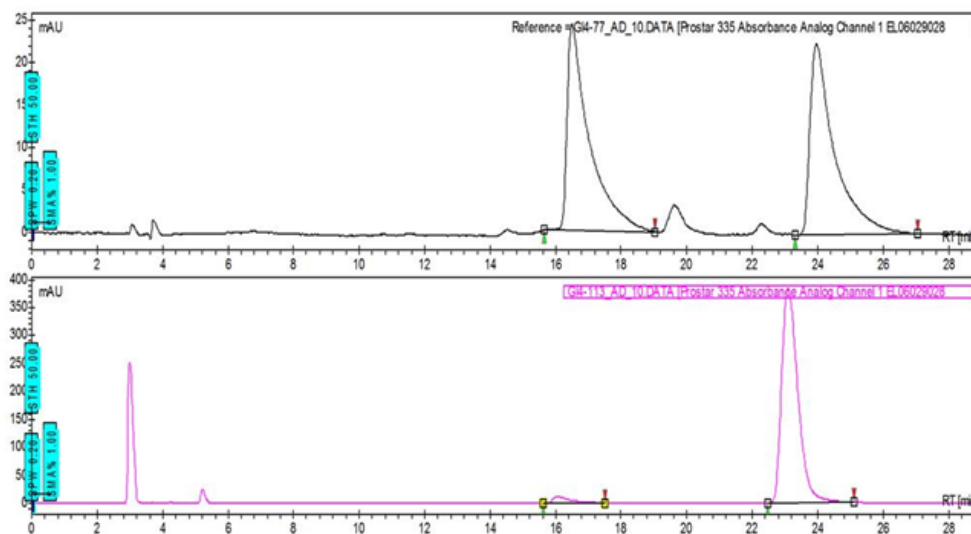

## Peak results :

GI4-77\_AD\_10.DATA [Prostar 335 Absorbance Analog Channel 1 EL06029028 ]

| Index | Time [Min] | Height [mAU] | Width USP [Min] | Area [mAU.Min] | Area % [%] |
|-------|------------|--------------|-----------------|----------------|------------|
| 1     | 16.51      | 24.3         | 1.01            | 19.0           | 49.505     |
| 2     | 23.96      | 22.4         | 1.12            | 19.4           | 50.495     |
| Total |            | 46.7         |                 | 38.5           | 100.000    |

GI4-113\_AD\_10.DATA [Prostar 335 Absorbance Analog Channel 1 EL06029028 ]

| Index | Time [Min] | Height [mAU] | Width USP [Min] | Area [mAU.Min] | Area % [%] |
|-------|------------|--------------|-----------------|----------------|------------|
| 1     | 16.05      | 11.7         | 0.84            | 7.2            | 3.161      |
| 2     | 23.09      | 383.8        | 0.89            | 221.2          | 96.839     |
| Total |            | 395.6        |                 | 228.5          | 100.000    |

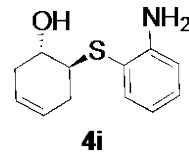

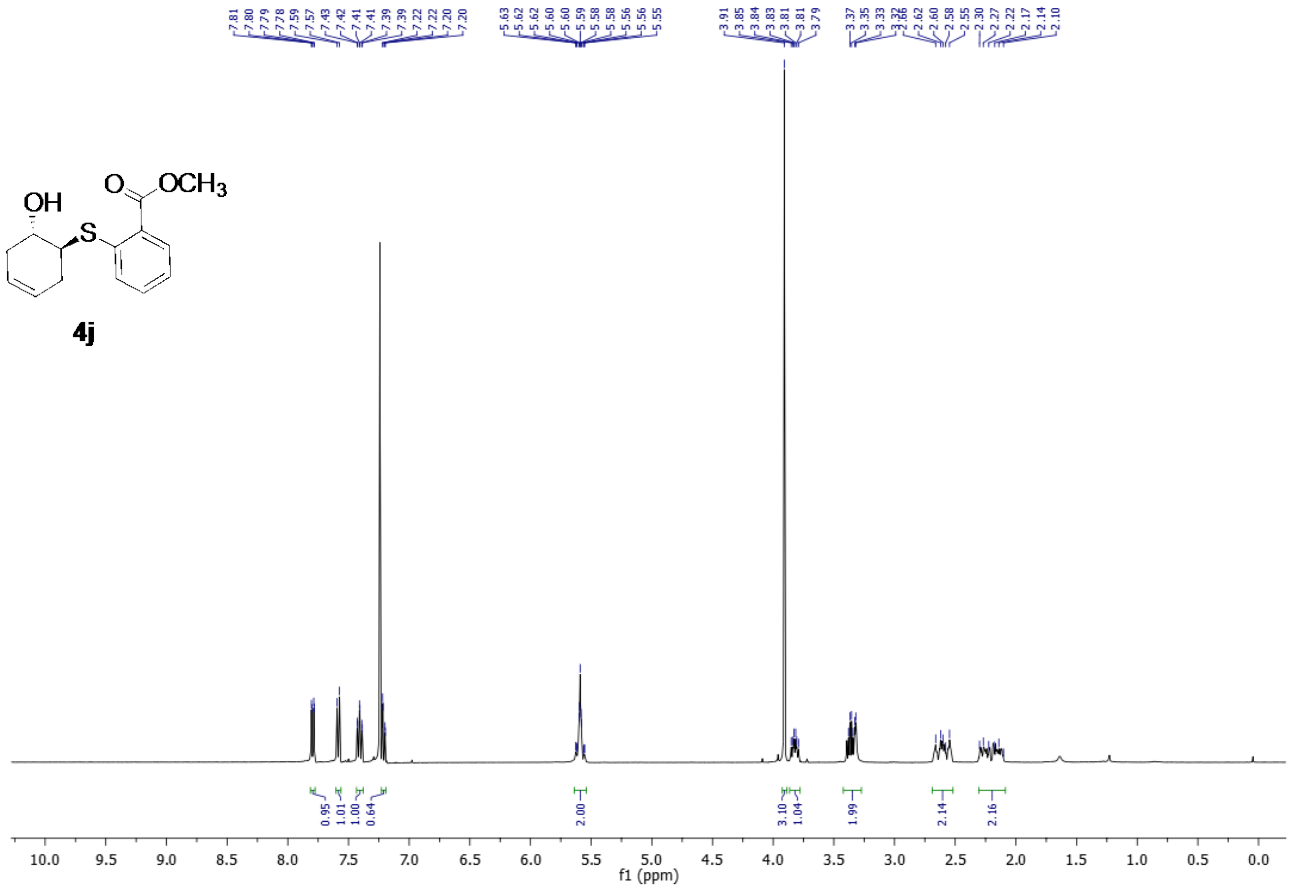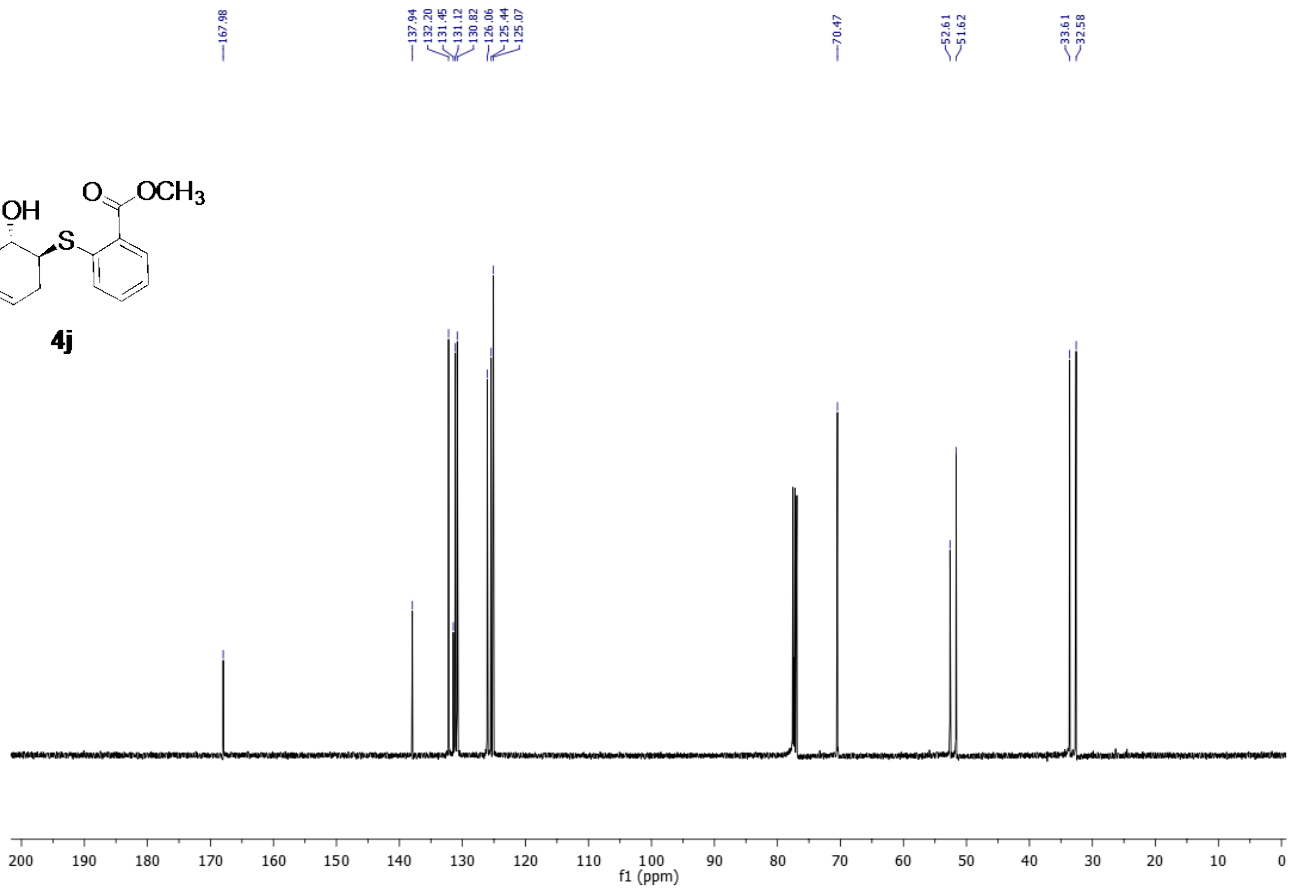

# Chromatogram : GI4-152(OD\_15)2\_channel1

System : HPLC  
Method : Ingle  
User : User1

Acquired : 3/23/2012 7:49:12 PM  
Processed : 3/23/2012 8:15:57 PM  
Printed : 7/17/2012 3:39:36 PM

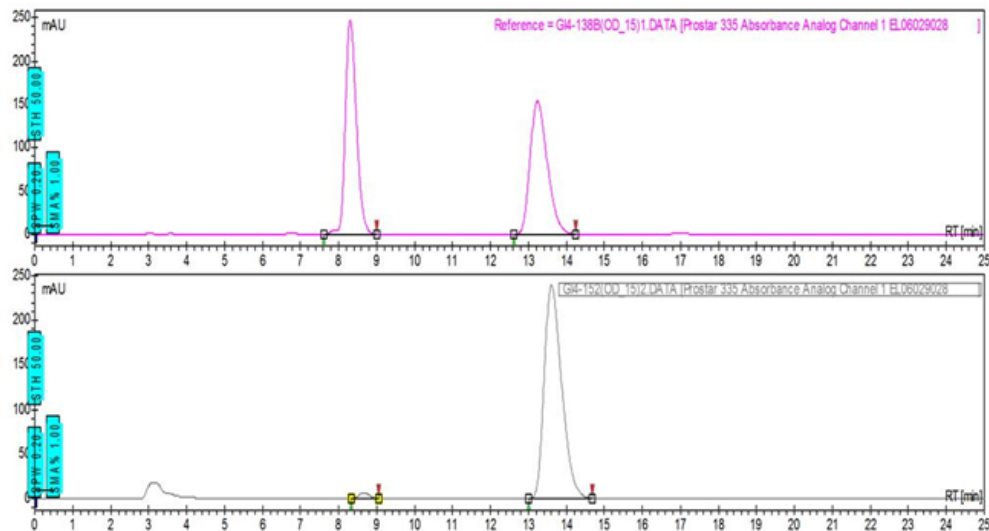

## Peak results :

GI4-138B(OD\_15)1.DATA [Prostar 335 Absorbance Analog Channel 1 EL06029028 ]

| Index | Time [Min] | Height [mAU] | Width USP [Min] | Area [mAU.Min] | Area % [%] |
|-------|------------|--------------|-----------------|----------------|------------|
| 1     | 8.31       | 246.3        | 0.53            | 83.1           | 50.424     |
| 2     | 13.24      | 154.2        | 0.84            | 81.7           | 49.576     |
| Total |            | 400.6        |                 | 164.8          | 100.000    |

GI4-152(OD\_15)2.DATA [Prostar 335 Absorbance Analog Channel 1 EL06029028 ]

| Index | Time [Min] | Height [mAU] | Width USP [Min] | Area [mAU.Min] | Area % [%] |
|-------|------------|--------------|-----------------|----------------|------------|
| 1     | 8.65       | 7.2          | 0.51            | 2.3            | 1.749      |
| 2     | 13.60      | 238.9        | 0.85            | 127.5          | 98.251     |
| Total |            | 246.1        |                 | 129.8          | 100.000    |

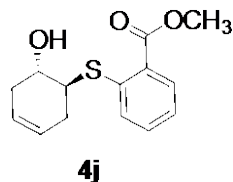

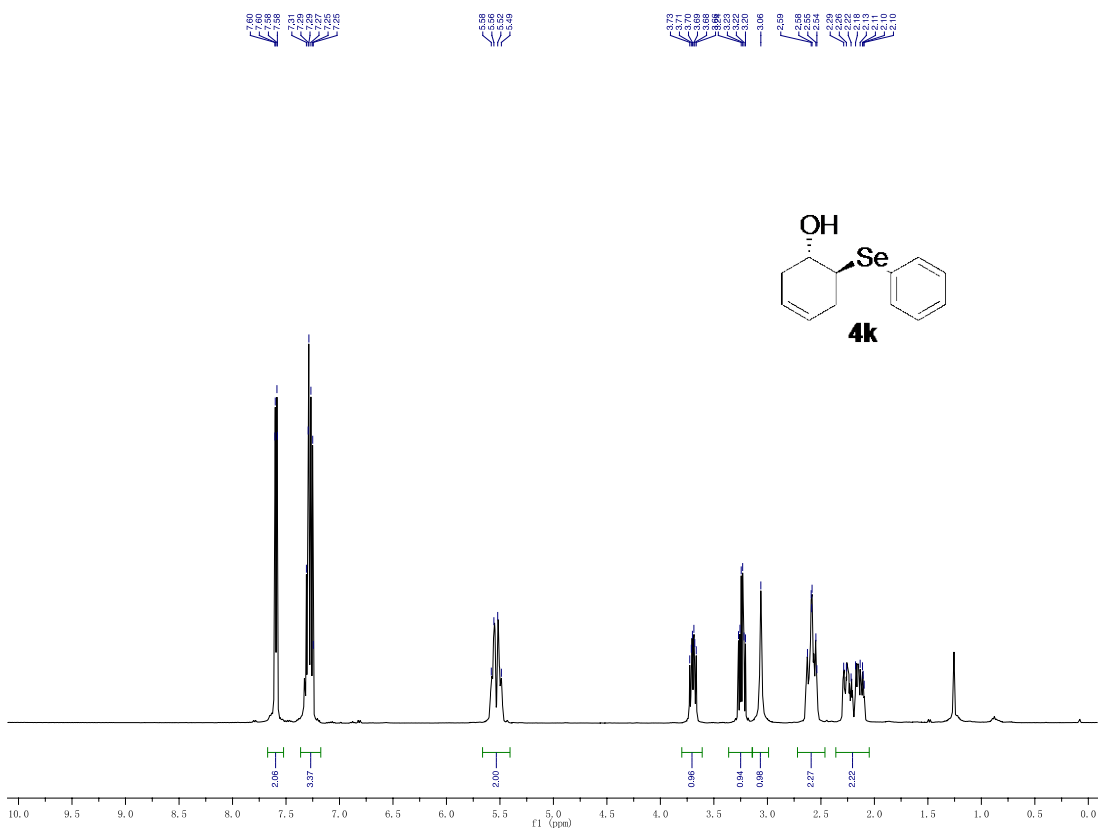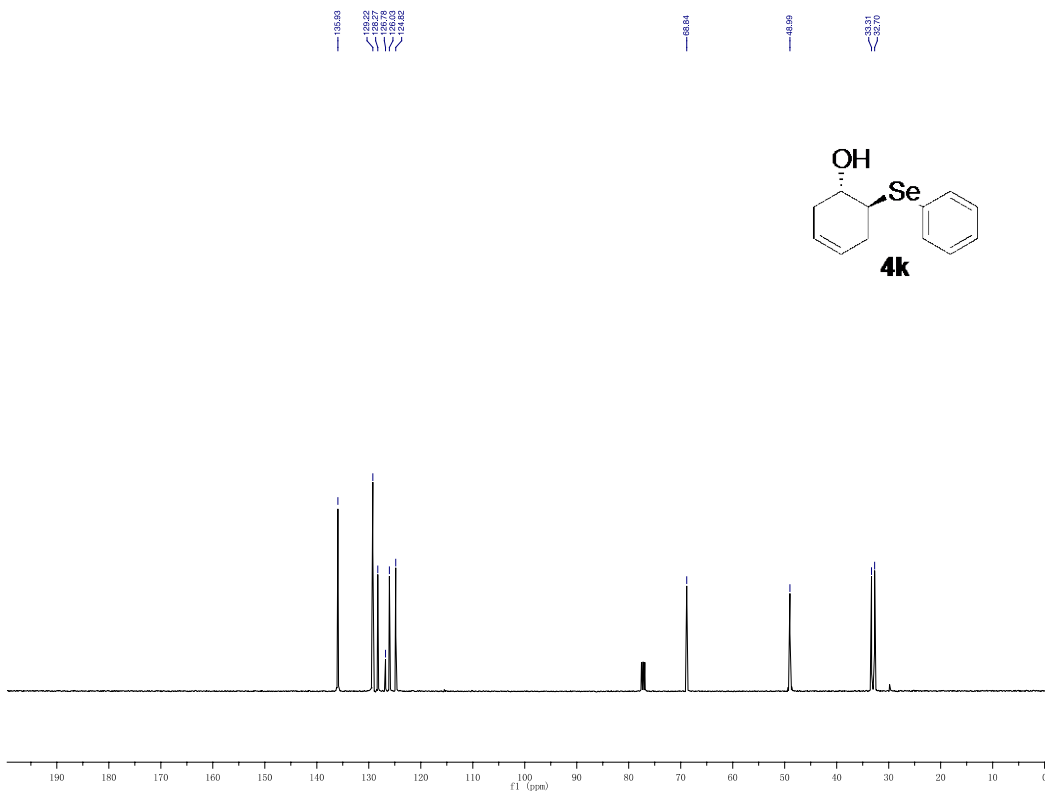

# Chromatogram : G15-46(OD\_10)\_channel1

System : HPLC  
 Method : Ingle  
 User : User1

Acquired : 9/1/2012 12:33:43 PM  
 Processed : 9/1/2012 1:15:42 PM  
 Printed : 9/2/2012 10:01:55 PM

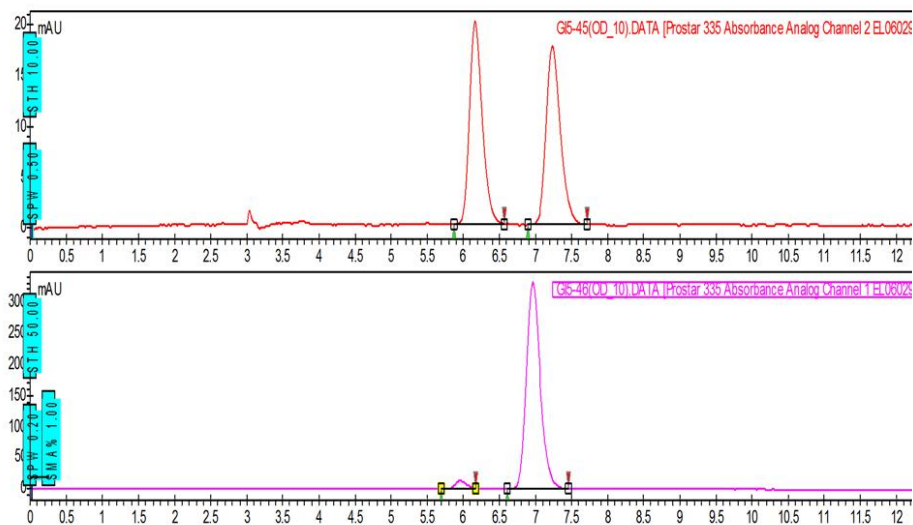

## Peak results :

G15-45(OD\_10).DATA [Prostar 335 Absorbance Analog Channel 2 EL06029028]

| Index | Name    | Time [Min] | Quantity [% Area] | Height [mAU] | Area [mAU.Min] | Area % [%] |
|-------|---------|------------|-------------------|--------------|----------------|------------|
| 1     | UNKNOWN | 6.16       | 50.16             | 20.0         | 4.0            | 50.160     |
| 2     | UNKNOWN | 7.24       | 49.84             | 17.6         | 4.0            | 49.840     |
| Total |         |            | 100.00            | 37.5         | 8.0            | 100.000    |

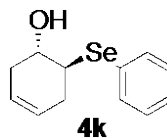

G15-46(OD\_10).DATA [Prostar 335 Absorbance Analog Channel 1 EL06029028]

| Index | Time [Min] | Height [mAU] | Width USP [Min] | Area [mAU.Min] | Area % [%] |
|-------|------------|--------------|-----------------|----------------|------------|
| 1     | 5.96       | 12.7         | 0.30            | 2.3            | 3.027      |
| 2     | 6.96       | 331.8        | 0.36            | 75.0           | 96.973     |
| Total |            | 344.4        |                 | 77.3           | 100.000    |
